# Supplementary material for: O2activation by core–shell Ru13@Pt42particles in comparison with Pt55particles: a DFT study
Source: Royal Society of Chemistry journal article supplement (doi:10.1039/d0ra05738j), 2020-01-01
Supplement: d0ra05738j1.pdf [file d0ra05738j1.pdf]

Supporting Information

**O<sub>2</sub> Activation by Core-shell Ru<sub>13</sub>@Pt<sub>42</sub> Particle in Comparison with Pt<sub>55</sub>  
Particle: DFT Study**

Jing Lu,<sup>†</sup> Bo Zhu<sup>‡</sup> and Shigeyoshi Sakaki<sup>\*‡§</sup>

<sup>†</sup>Hubei Key Laboratory of Advanced Textile Materials & Application, Hubei International Scientific and Technological Cooperation Base of Intelligent Textile Materials & Application, Wuhan Textile University, Wuhan 430200, China

<sup>‡</sup>Element Strategy Initiative for Catalysts and Batteries, Kyoto University, Goryo-Ohara 1-30, Nishikyo-ku, Kyoto 615-8245, Japan

<sup>§</sup>Fukui Institute for Fundamental Chemistry (FIFC), Kyoto University, Takano-Nishihiraki-cho 34-4, Sakyou-ku, Kyoto 606-8103, Japan

## Table of Contents

|                                                                                                                                                                |            |
|----------------------------------------------------------------------------------------------------------------------------------------------------------------|------------|
| <b>Scheme S1.</b> (a) Possible adsorption structures of 2(O) species and (b) (O)(OH) species.....                                                              | <b>S3</b>  |
| <b>(O<sub>2</sub>)-Binding</b> .....                                                                                                                           | <b>S3</b>  |
| <b>Figure S1.</b> Optimized structures of (O <sub>2</sub> )-binding species at different sites.....                                                            | <b>S3</b>  |
| <b>2O-Binding</b> .....                                                                                                                                        | <b>S4</b>  |
| <b>Figure S2.</b> Optimized structures and relative energies (in kcal/mol) for 2O-binding species...                                                           | <b>S4</b>  |
| <b>Discussion of 2O-Adsorption Site</b> .....                                                                                                                  | <b>S4</b>  |
| <b>OOH-Binding</b> .....                                                                                                                                       | <b>S5</b>  |
| <b>Figure S3.</b> Optimized structures of OOH-binding species at different sites.....                                                                          | <b>S5</b>  |
| <b>Discussion of OOH-Adsorption Site</b> .....                                                                                                                 | <b>S5</b>  |
| <b>(O)(OH)-Binding</b> .....                                                                                                                                   | <b>S6</b>  |
| <b>Figure S4.</b> Optimized structures and relative energies (in kcal/mol) for O(OH)-binding species.....                                                      | <b>S6</b>  |
| <b>Discussion of (O)(OH)-Adsorption Site</b> .....                                                                                                             | <b>S6</b>  |
| <b>Stability of Ru<sub>13</sub>@Pt<sub>42</sub></b> .....                                                                                                      | <b>S7</b>  |
| <b>Table S1.</b> Total energies (in eV) for Pt <sub>55</sub> and Pt <sub>42</sub> Ru <sub>13</sub> in different possible spin states using PBE-D3 method. .... | <b>S7</b>  |
| <b>Table S2.</b> Binding energies ( $E_b$ , in eV) for O <sub>2</sub> and OOH species. ....                                                                    | <b>S8</b>  |
| <b>Table S3.</b> Binding energies ( $E_b$ , in eV) for O, OH, and H/x-binding species.....                                                                     | <b>S8</b>  |
| <b>Discussion of O, OH and H-Adsorption Site</b> .....                                                                                                         | <b>S9</b>  |
| <b>The dependence of DOS on the box size in periodic DFT calculation</b> .....                                                                                 | <b>S10</b> |
| <b>DOSs of Pt<sub>55</sub> and Ru<sub>13</sub>@Pt<sub>42</sub> calculated by the B3LYP and the PBE functionals</b> .....                                       | <b>S11</b> |
| <b>The d-valence band-top energy of the Pt<sub>42</sub> shell in Ru<sub>13</sub>@Pt<sub>42</sub> and Pt<sub>55</sub></b> .....                                 | <b>S12</b> |
| <b>References</b> .....                                                                                                                                        | <b>S13</b> |
| <b>Cartesian coordinates</b> .....                                                                                                                             | <b>S14</b> |

**Scheme S1.** (a) Possible adsorption structures of 2(O) species and (b) (O)(OH) species.

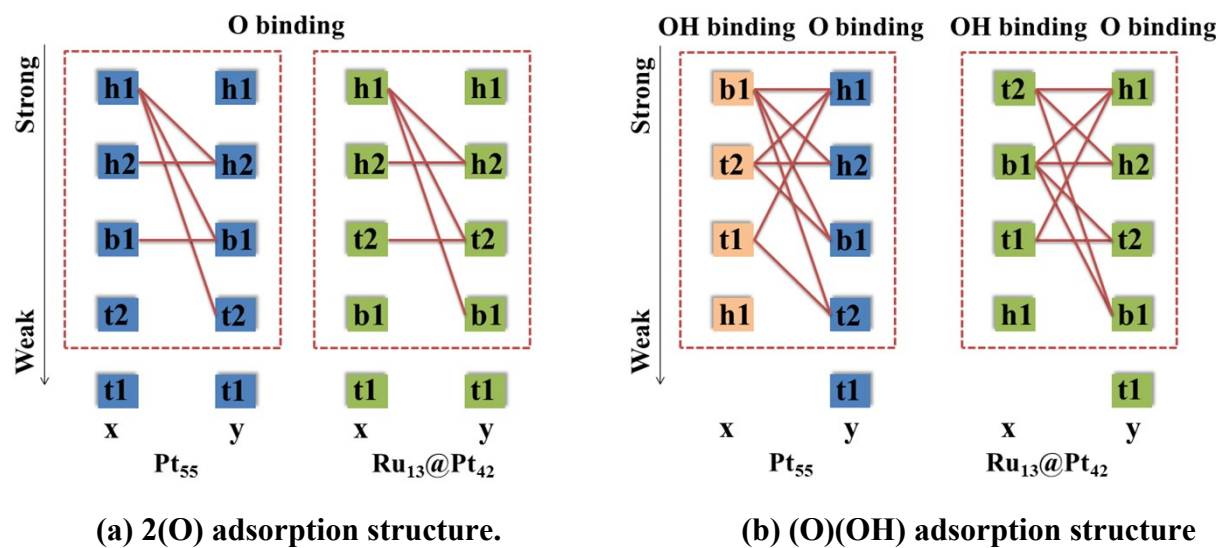

### (O<sub>2</sub>)-Binding

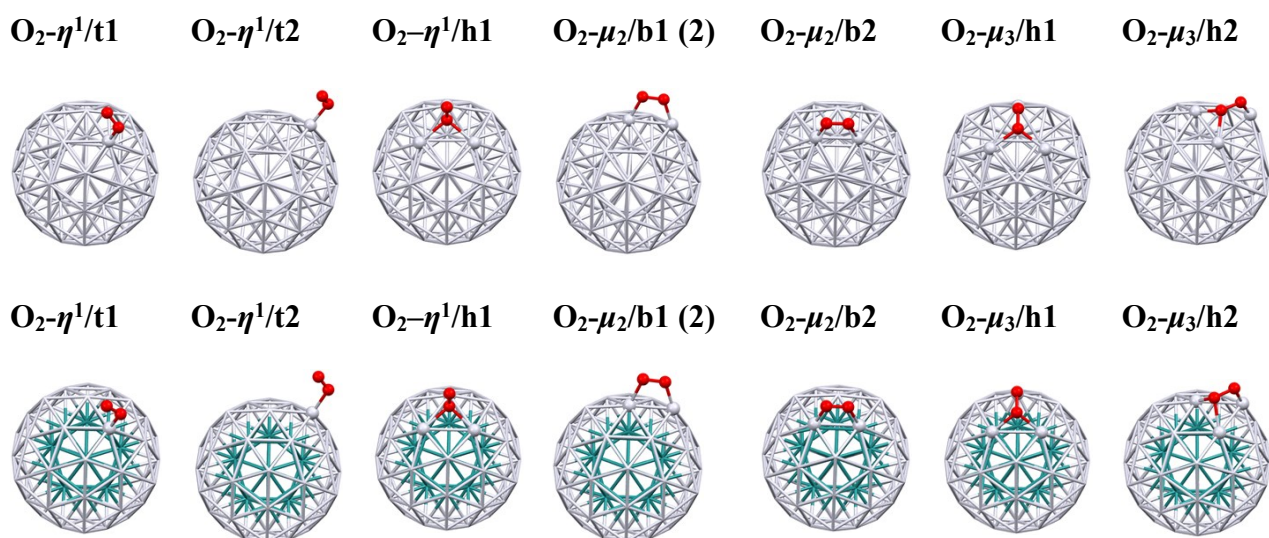

**Figure S1.** Optimized structures of (O<sub>2</sub>)-binding species at different sites.

## 2O-Binding

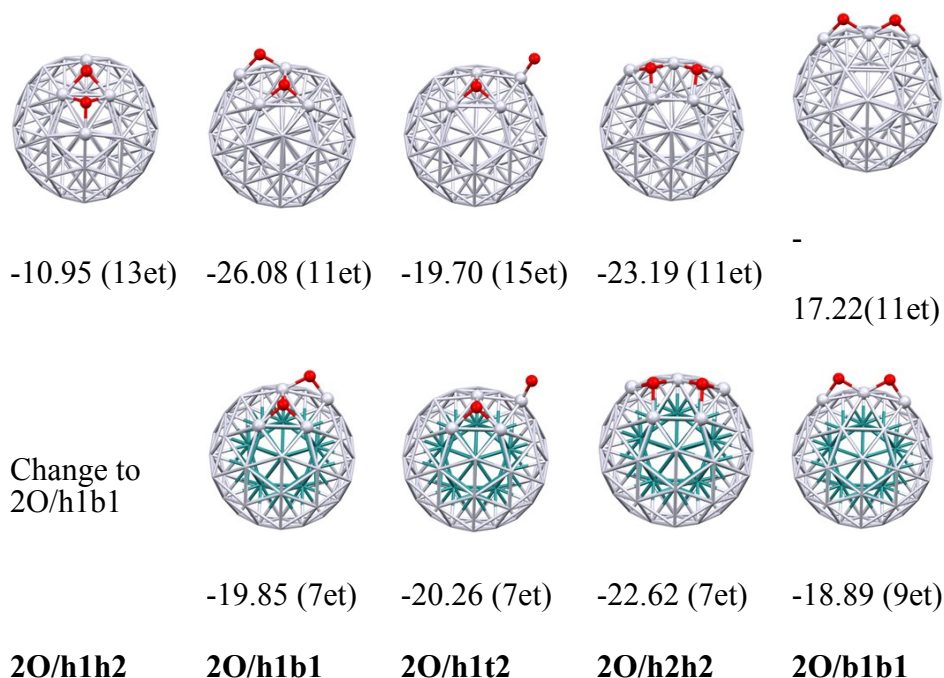

**Figure S2.** Optimized structures and relative energies (in kcal/mol) for 2O-binding species.

Note:  $\Delta E = E_t(2O/xy) - E_t(O_2-\mu_2/b1)$ .

In  $Ru_{13}@Pt_{42}$ , the 2O migrates from h1h2 sites to h1b1 sites.

**Adsorption Sites of two O atoms.** Because the direct O-O bond cleavage of dioxygen ( $O_2$ ) molecule affords two O atoms bound on the  $Pt_{42}$  surface, we investigated  $Pt_{55}$  and  $Ru_{13}@Pt_{42}$  clusters bound with two O atoms as final state (FS) of the direct O-O bond cleavage of  $O_2$  molecule ( $O_2 \rightarrow 2O$ ), as will be discussed below. Because the  $(O)_2$ -binding energy becomes more negative following the order  $t1 < t2 < b1 < h2 < h1$  for  $Pt_{55}$  and  $t1 < b1 < t2 < h2 < h1$  for  $Ru_{13}@Pt_{42}$ , as shown in Table S3, several typical binding positions including 2O/h1h2, 2O/h1b1, 2O/h1t2, 2O/h2h2, and 2O/b1b1 were investigated, as shown in Scheme S1, where 2O/h1h2 etc represents two O atoms adsorbed at h1 and h2 sites. The optimized structures and relative energies to the  $O_2-\mu_2/b1$ -binding species are shown in Figures S1 and S2 and Table S3. For  $Pt_{55}$ , 2O/h1b1-adsorption species is the most stable and the 2O/h2h2-adsorption species is the next. For  $Ru_{13}@Pt_{42}$ , 2O/h2h2 is the most stable combination and 2O/h1t2 is the next.

## OOH-Binding

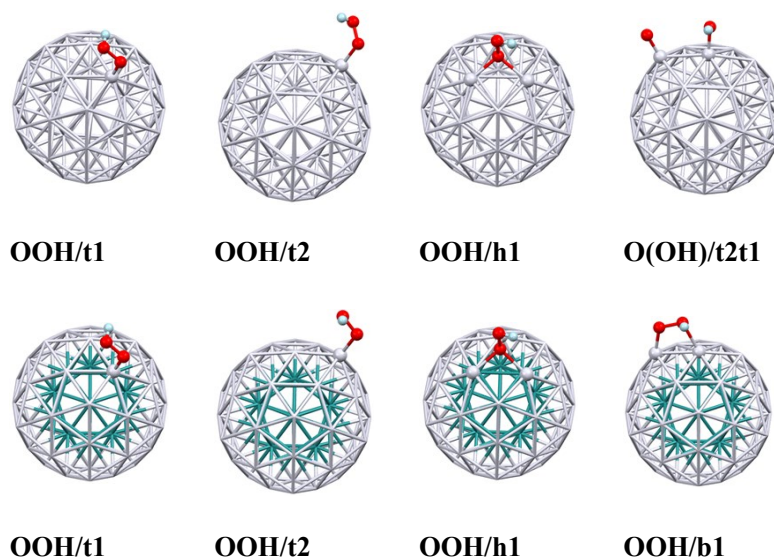

**Figure S3.** Optimized structures of OOH-binding species at different sites.

**OOH-Adsorption Site.** The OOH-binding species is one of the important intermediates for ORR. As listed in Table S2, the OOH binding energy increases (more negative) in the order of  $\eta^1/h1 < \eta^1/t1 < \eta^1/t2$  for Pt<sub>55</sub> and  $\mu_2/h1 < \eta^1/t1 < \eta^1/b1 < \eta^1/t2$  for Ru<sub>13</sub>@Pt<sub>42</sub>; the optimized structures are shown in Figure S3 in the Supporting Information. We tried to optimize the OOH binding at the h2 and b2 sites but the OOH group changed its binding position to the t2 and t1 sites, respectively, during the optimization. This means that the OOH/h2 and OOH/b2 species are not stable. In the case of Pt<sub>55</sub>, the OOH-binding at the b1 site in  $\mu_2$ -side-on structure is not stable but the O-OH bond cleavage occurs to afford O and OH species without energy barrier, where O and OH are located at the t2 and t1 sites, respectively. Also, we found that the OOH binding energy with Ru<sub>13</sub>@Pt<sub>42</sub> is smaller (less negative) than that with Pt<sub>55</sub> at the same adsorption site (Table S2).

## (O)(OH)-Binding

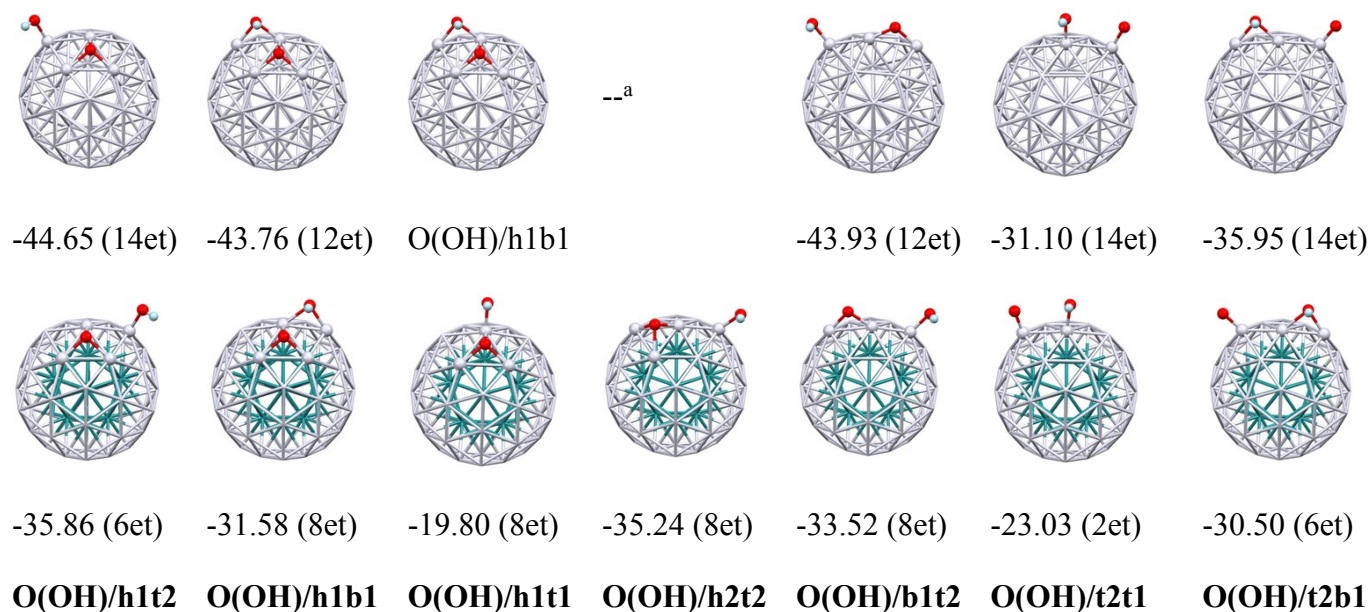

**Figure S4.** Optimized structures and relative energies (in kcal/mol) for O(OH)-binding species.

Note:  $\Delta E = E_t\{\text{O(OH)}/xy\} - E_t(\text{OOH}/t2)$ ;

O(OH)/h2b1 migrates to O(OH)/h2t2 after optimization; O(OH)/b1b1 migrates to O(OH)/b1t2 after optimization. <sup>a</sup> Icosahedron-like structure completely lost.

**(O)(OH)-Adsorption Site.** In this species, many possible adsorption structures should be investigated. As was discussed above, the O atom tends to interact with Pt<sub>55</sub> and Ru<sub>13</sub>@Pt<sub>42</sub> at the h1 and h2 sites and the next is b1 or t2. The OH group tends to interact with Pt<sub>55</sub> and Ru<sub>13</sub>@Pt<sub>42</sub> at the t2 and b1 sites. Considering these favorable adsorption structures, we investigated (O)(OH)/h1t2, (O)(OH)/h1b1, (O)(OH)/h2t2, (O)(OH)/h2b1, (O)(OH)/b1t2, (O)(OH)/b1b1, (O)(OH)/t2t1, and (O)(OH)/t2b1-adsorption structures; their optimized structures and relative energies are shown in Figure S4. Among them, the (O)(OH)/h1t2-adsorption species is the most stable in both Pt<sub>55</sub> and Ru<sub>13</sub>@Pt<sub>42</sub>. The (O)(OH)/b1t2 is the next stable, while the energy difference from the most stable species is not large.

## Stability of Ru<sub>13</sub>@Pt<sub>42</sub>

Previously, we have investigated the stability of the icosahedron-like Pt<sub>42</sub>Ru<sub>13</sub> clusters at the PBE-D2 theoretical level, among which the core-shell Ru<sub>13</sub>@Pt<sub>42</sub> is the most stable isomer.<sup>92</sup> In this study, PBE-D3 method was adopted to calculate the total energies for Pt<sub>55</sub> and Pt<sub>42</sub>Ru<sub>13</sub> in different possible spin states (see Table S1). Core-shell structure (Ru<sub>13</sub>@Pt<sub>42</sub>) in the septet state is much more stable than these non-core-shell structures (Pt<sup>core-1</sup>Ru<sub>12</sub>@Pt<sub>41</sub>Ru<sup>edge</sup> and Pt<sup>core-1</sup>Ru<sub>12</sub>@Pt<sub>41</sub>Ru<sup>vertex</sup>) and the corresponding energy difference between Ru<sub>13</sub>@Pt<sub>42</sub> and Pt<sup>core-1</sup>Ru<sub>12</sub>@Pt<sub>41</sub>Ru<sup>edge</sup> (Pt<sup>core-1</sup>Ru<sub>12</sub>@Pt<sub>41</sub>Ru<sup>vertex</sup>) is 49.03 kcal/mol (43.27 kcal/mol).

**Table S1.** Total energies (in eV) for Pt<sub>55</sub> and Pt<sub>42</sub>Ru<sub>13</sub> in different possible spin states using PBE-D3 method.

|      | Pure cluster                                                                        | Core-shell structure                                                                | Non-core-shell structure                                                                  |                                                                                             |
|------|-------------------------------------------------------------------------------------|-------------------------------------------------------------------------------------|-------------------------------------------------------------------------------------------|---------------------------------------------------------------------------------------------|
|      | 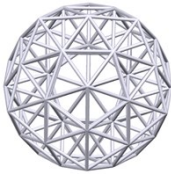 |  |        |        |
|      | Pt <sub>55</sub> (1)                                                                | Ru <sub>13</sub> @Pt <sub>42</sub> (1)                                              | Pt <sup>core-</sup><br><sup>1</sup> Ru <sub>12</sub> @Pt <sub>41</sub> Ru <sup>edge</sup> | Pt <sup>core-</sup><br><sup>1</sup> Ru <sub>12</sub> @Pt <sub>41</sub> Ru <sup>vertex</sup> |
| 5et  | -296.41180390                                                                       | -346.70813144                                                                       | -344.61750489                                                                             | -344.84553235                                                                               |
| 7et  | -296.51106938                                                                       | <b>-346.87191611</b>                                                                | <b>-344.74563887</b>                                                                      | <b>-344.99539856</b>                                                                        |
| 9et  | -296.64541681                                                                       | -346.51349432                                                                       | -344.52195304                                                                             | -344.67233624                                                                               |
| 11et | -296.80830127                                                                       |                                                                                     |                                                                                           |                                                                                             |
| 13et | -296.97450017                                                                       |                                                                                     |                                                                                           |                                                                                             |
| 15et | <b>-296.99019548</b>                                                                |                                                                                     |                                                                                           |                                                                                             |
| 17et | -296.75368939                                                                       |                                                                                     |                                                                                           |                                                                                             |

**Table S2.** Binding energies ( $E_b$ , in eV) for O<sub>2</sub> and OOH species.<sup>a</sup>

| Site x      | Pt <sub>55</sub>            | Ru <sub>13</sub> @Pt <sub>42</sub> | Pt <sub>55</sub>            | Ru <sub>13</sub> @Pt <sub>42</sub> |
|-------------|-----------------------------|------------------------------------|-----------------------------|------------------------------------|
|             | O <sub>2</sub>              |                                    | 4 (OOH-adsorbed species)    |                                    |
| $\eta^1/t1$ | -1.05 (11et) <sup>a</sup>   | -0.37 (9et)                        | -4.18 (10et)                | -3.57 (6et)                        |
| $\eta^1/t2$ | -1.13 (13et)                | -0.72 (7et)                        | <b>-4.30 (14et)</b>         | <b>-3.98 (6et)</b>                 |
| $\eta^1/h1$ | -0.25 (13et)                | 0.42 (7et)                         | -3.75 (14et)                | -3.15 (8et)                        |
| $\eta^1/h2$ | To $\eta^1-t2$ <sup>b</sup> | To $\eta^1-t2$ <sup>b</sup>        | To $\eta^1-t2$ <sup>b</sup> | To $\eta^1-t2$ <sup>b</sup>        |
| $\mu_2/b1$  | -1.70 (11et)                | -0.95 (7et)                        | - <sup>c</sup>              | -3.89 (6et)                        |
| $\mu_2/b2$  | -1.41 (11et)                | -0.19 (9et)                        | To $t1-\eta^1$              | To $t1-\eta^1$                     |

<sup>a</sup> The most stable spin state is given in parentheses.

<sup>b</sup> The  $\eta^1/h2$  adsorption structure was converted to the  $\eta^1-t2$  structure during the geometry optimization.

<sup>c</sup> OOH decomposes into O and OH at the top sites, where O is connected at t2 site and OH is connected at t1 site.

**Table S3.** Binding energies ( $E_b$ , in eV) for O, OH, and H/x-binding species.

| Site x    | Pt <sub>55</sub>    | Ru <sub>13</sub> @Pt <sub>42</sub> | Pt <sub>55</sub>    | Ru <sub>13</sub> @Pt <sub>42</sub> | Pt <sub>55</sub>    | Ru <sub>13</sub> @Pt <sub>42</sub> |
|-----------|---------------------|------------------------------------|---------------------|------------------------------------|---------------------|------------------------------------|
|           | O <sup>a</sup>      |                                    | OH <sup>b</sup>     |                                    | H <sup>c</sup>      |                                    |
| <b>t1</b> | -4.14 (15et)        | -3.30 (9et)                        | -3.19 (12et)        | -2.59 (6et)                        | -2.95 (12et)        | -2.45 (8et)                        |
| <b>t2</b> | -4.46 (15et)        | -4.25 (7et)                        | <b>-3.35 (12et)</b> | <b>-3.06 (6et)</b>                 | -2.77 (14et)        | -2.55 (6et)                        |
| <b>h1</b> | <b>-5.01 (11et)</b> | <b>-4.41 (7et)</b>                 | -2.94 (14et)        | -2.35 (8et)                        | -2.76 (14et)        | -2.60 (8et)                        |
| <b>h2</b> | -4.91 (11et)        | -4.33 (7et)                        | t2                  | t2                                 | -3.00 (12et)        | -2.63 (8et)                        |
| <b>b1</b> | -4.84 (13et)        | -4.22 (9et)                        | <b>-3.38 (10et)</b> | -2.86 (8et)                        | <b>-3.07 (12et)</b> | <b>-2.70 (8et)</b>                 |

<sup>a</sup> O migrates from b2 to *hcp*-like h2.

<sup>b</sup> OH migrates from b2 to *fcc*-like h1.

<sup>c</sup> H migrates from b2 to *hcp*-like h2.



**O-Adsorption site.** Single O atom is preferentially adsorbed at the *fcc*-like h1 site with  $E_b(\text{O}/\text{h1})$  of -5.01 eV and -4.41 eV for  $\text{Pt}_{55}$  and  $\text{Ru}_{13}@\text{Pt}_{42}$ , respectively, as listed in Table 2. For  $\text{Pt}_{55}$ , the  $E_b(\text{O})$  increases (becomes more negative) following the order  $t1 > t2 > b1 > h2 > h1$ . The adsorbed O atom at the b2 site easily moves to *hcp*-like h2 site during geometry optimization. For  $\text{Ru}_{13}@\text{Pt}_{42}$ , the  $E_b(\text{O})$  increases (becomes more negative) following the order  $t1 > b1 > t2 > h2 > h1$ . The O atom easily migrates from the b2 to the h2 site during geometry optimization, similar to the  $\text{Pt}_{55}$  case discussed above. The binding energy of single O at the same adsorption site of  $\text{Ru}_{13}@\text{Pt}_{42}$  is found to be larger (less negative) than that of  $\text{Pt}_{55}$ .

**OH-Adsorption Site.** The binding energy increases (becomes more negative) following the order  $h1 < t1 < t2 \approx b1$  for  $\text{Pt}_{55}$  and  $h1 < t1 < b1 < t2$  for  $\text{Ru}_{13}@\text{Pt}_{42}$ , as listed in Table S3. Both the t2 and b1 sites on the  $\text{Pt}_{55}$  surface are preferable for OH-binding, where  $E_b(\text{OH}/t2)$  is -3.35 eV and  $E_b(\text{OH}/b1)$  -3.38 eV. In  $\text{Ru}_{13}@\text{Pt}_{42}$ , on the other hand, t2 is the most favorable for OH-binding, where  $E_b(\text{OH}/t2)$  is -3.06 eV. The OH-binding energy with  $\text{Ru}_{13}@\text{Pt}_{42}$  is less negative than that with  $\text{Pt}_{55}$ .

**H-Adsorption site.** In the ORR catalytic cycle, the reaction of hydrogen atom (or proton) with oxygen-containing species is involved. We investigated that H was bound with metal cluster and then reacted with oxygen-containing species on the surface, as was discussed in recent works.<sup>45-46</sup> This is reasonable because a lot of protons exist around the electrode, its adsorption to the electrode surface occurs easily, and one-electron reduction of proton to hydrogen occurs easily at the cathode which is negatively charged. As shown in Table S3, the H-binding energy increases (becomes more negative) following the order of  $h1 \approx t2 < t1 < h2 < b1$  for  $\text{Pt}_{55}$  and  $t1 < t2 < h1 < h2 < b1$  for  $\text{Ru}_{13}@\text{Pt}_{42}$ . The best binding site is b1 for both  $\text{Pt}_{55}$  and  $\text{Ru}_{13}@\text{Pt}_{42}$ , where  $E_b(\text{H}/b1)$  is -3.07 eV and -2.70 eV, respectively.

### The dependence of DOS on the box size in periodic DFT calculations

We checked the dependence of the Fermi level on the box size of periodic calculation.

**Table S4.** The Fermi level ( $\epsilon_F$ , eV) and the d-valence band top ( $\epsilon_{VB\_top}$ , eV) energies

| Box size                               | Before correction |                      | After correction |                      |
|----------------------------------------|-------------------|----------------------|------------------|----------------------|
|                                        | $\epsilon_F$      | $\epsilon_{VB\_top}$ | $\epsilon_F$     | $\epsilon_{VB\_top}$ |
| <b>Pt<sub>55</sub></b>                 |                   |                      |                  |                      |
| 25x25x25                               | -4.53             | -4.57                | -5.40            | -5.44                |
| 35x35x35                               | -5.09             | -5.13                | -5.41            | -5.45                |
| <b>Ru<sub>13</sub>@Pt<sub>42</sub></b> |                   |                      |                  |                      |
| 25x25x25                               | -4.51             | -5.06                | -5.38            | -5.93                |
| 35x35x35                               | -5.09             | -5.67                | -5.40            | -5.98                |

As shown in Table S4, the direct computational results of the Fermi level ( $\epsilon_F$ ) and d-valence band top ( $\epsilon_{VB\_top}$ ) without correction depend on the box size. However, the Fermi level ( $\epsilon_F$ ) and d-valence band top ( $\epsilon_{VB\_top}$ ) little differ between two box sizes after the correction of vacuum level by the Baldereschi procedure.<sup>1</sup>

### DOSs of Pt<sub>55</sub> and Ru<sub>13</sub>@Pt<sub>42</sub> calculated by the B3LYP and the PBE functionals.

The DOS and PDOS were calculated using the B3LYP,<sup>2</sup> B3PW91<sup>2a,3</sup> and PBE<sup>4</sup> functionals with LANL2DZ<sup>5</sup> in our previous work,<sup>6</sup> using the conventional DFT method. In this work, we performed periodic DFT calculations employing the PBE functional with plane wave basis sets.

We compared the Fermi level and the d-valence band top in Table S5. In our previous work,<sup>6</sup> the B3LYP, B3PW91 and PBE functionals provided the lower energy of d-valence band-top in Pt<sub>55</sub> than in Ru<sub>13</sub>@Pt<sub>42</sub>. Though the absolute values depend on the functional, the difference in the d-valence band-top energy between Pt<sub>55</sub> and Ru<sub>13</sub>@Pt<sub>42</sub> is similar in these three cases. On the basis of these results, it is likely concluded that the trend of the d-valence band-top energy is calculated well using these three functionals.

In this work, the PBE functional with plane-wave basis set provided the higher energy of d-valence band-top of Pt<sub>55</sub> than that of Ru<sub>13</sub>@Pt<sub>42</sub>; this is different trend from the results of the B3LYP, B3PW91 and PBE calculations with LANL2DZ basis set. It is likely that the difference in basis set is the origin of the difference in computational result, because these three functionals provided the same trend when LANL2DZ was used and the LANL2DZ is small, and that the results calculated by the PBE/plane-wave basis set seem better than the B3LYP or PBE/LANL2DZ calculation.

**Table S5.** d-Valence band top energy (in eV) calculated using several different functionals and basis sets

| Functional/Basis sets                   | Pt <sub>55</sub> | Ru <sub>13</sub> @Pt <sub>42</sub> |
|-----------------------------------------|------------------|------------------------------------|
| PBE/plane-wave basis set <sup>a</sup>   | -4.57            | -5.06                              |
| PBE0/plane-wave basis set <sup>a</sup>  |                  |                                    |
| HSE06/plane-wave basis set <sup>a</sup> |                  |                                    |
|                                         |                  |                                    |
| B3LYP/LAN2DZ <sup>b</sup>               | -5.87            | -5.78                              |
| B3PW91/LAN2DZ <sup>b</sup>              | -5.93            | -5.84                              |
| PBE/LAN2DZ <sup>b</sup>                 | -5.42            | -5.36                              |

a) This work. b) Ref. 6.

### **The d-valence band-top energy of the Pt<sub>42</sub> shell in Ru<sub>13</sub>@Pt<sub>42</sub> and Pt<sub>55</sub>**

Because Ru metal is more easily oxidized than Pt metal, it is likely that the fused alloy metal consisting of Ru and Pt is more easily oxidized than pure Pt metal. However, in the core-shell particle Ru<sub>13</sub>@Pt<sub>42</sub>, the Ru<sub>13</sub> core influences the electronic structure of the Pt<sub>42</sub> shell through charge-transfer (CT) from the higher energy 4d orbital of Ru<sub>13</sub> core to Pt<sub>42</sub> shell and exchange repulsion between Ru<sub>13</sub> core and Pt<sub>42</sub> shell. The CT raises the d-valence band top energy of the Pt<sub>42</sub> shell because the CT enhances electron density on the Pt<sub>42</sub> shell. However, the exchange repulsion between the Ru 4d of the Ru<sub>13</sub> core and the Pt 5d of the Pt<sub>13</sub> shell in Ru<sub>13</sub>@Pt<sub>42</sub> is smaller than that between the Pt 5d of the Pt<sub>13</sub> core and the Pt 5d of the Pt<sub>42</sub> shell in Pt<sub>55</sub>. Because the smaller exchange repulsion raises less the d-valence band-top energy of the Pt<sub>42</sub> shell in Ru<sub>13</sub>@Pt<sub>42</sub> than in Pt<sub>55</sub>, it is likely that the smaller exchange repulsion between the Pt<sub>42</sub> shell and the Ru<sub>13</sub> core is one reason to lower the d-valence band-top energy of Ru<sub>13</sub>@Pt<sub>42</sub> compared to that in Pt<sub>55</sub>. In other words, the CT and the exchange repulsion provide the reverse effect on the d-valence band-top energy.

The larger O<sub>2</sub> adsorption energy, longer O-O bond distance, shorter Pt-O bond distance, and the smaller activation energy for O-O bond cleavage in Pt<sub>55</sub> than in Ru<sub>13</sub>@Pt<sub>42</sub> are good measures relating to the d orbital energy of the Pt<sub>42</sub> shell. All these results suggest strongly that the d valence band-top exists at higher energy in Pt<sub>55</sub> than in Ru<sub>13</sub>@Pt<sub>42</sub>. Considering these results, it is likely concluded that the computational results by the PBE/plane-wave basis set are reasonable and the exchange repulsion between the Ru<sub>13</sub> core and the Pt<sub>42</sub> shell is more important than the CT for determining the d-valence band-top energy.

## References:

1. C. J. Fall, N. Binggeli and A. Baldereschi, *J. Phys. Condens. Matter*, 1999, **11**, 2689.
2. (a) A. D. Becke, *J. Chem. Phys.*, 1993, **98**, 5648. (b) C. Lee, W. Yang, and R. G. Parr, *Phys. Rev. B*, 1988, **37**, 785-89. (c) S. H. Vosko, L. Wilk, and M. Nusair, *Can. J. Phys.*, 1980, **58**, 1200.
3. (a) J. P. Perdew, in *Electronic Structure of Solids '91*, Ed. P. Ziesche and H. Eschrig, Akademie Verlag, Berlin, 1991, p. 11. (b) J. P. Perdew, J. A. Chevary, S. H. Vosko, K. A. Jackson, M. R. Pederson, D. J. Singh, and C. Fiolhais, "Atoms, molecules, solids, and surfaces: Applications of the generalized gradient approximation for exchange and correlation," *Phys. Rev. B*, 1992, **46**, 6671.
4. (a) J. P. Perdew, K. Burke, and M. Ernzerhof, *Phys. Rev. Lett.*, 1996, **77**, 3865. (b) J. P. Perdew, K. Burke, and M. Ernzerhof, *Phys. Rev. Lett.*, 1997, **78**, 1396.
5. P. J. Hay and W. R. Wadt, *J. Chem. Phys.*, 1985, **82**, 299.
6. J. Lu, K. Ishimura and S. Sakaki, *J. Phys. Chem. C*, 2018, **122**, 9081.

## Cartesian coordinates

### Pt<sub>55</sub>

|    |           |           |           |
|----|-----------|-----------|-----------|
| Pt | 11.786936 | 11.261912 | 16.858248 |
| Pt | 12.924528 | 13.634377 | 17.477797 |
| Pt | 14.564960 | 11.711991 | 16.518789 |
| Pt | 10.441153 | 13.716669 | 16.413576 |
| Pt | 10.720446 | 9.012858  | 15.804358 |
| Pt | 14.935944 | 14.444880 | 15.864313 |
| Pt | 12.387311 | 15.683885 | 15.799268 |
| Pt | 13.405090 | 9.280103  | 15.638195 |
| Pt | 9.281341  | 11.284796 | 15.533033 |
| Pt | 15.999579 | 9.868165  | 15.159313 |
| Pt | 8.162965  | 13.677834 | 14.959374 |
| Pt | 12.714821 | 13.073933 | 15.018514 |
| Pt | 16.554153 | 12.463060 | 14.644329 |
| Pt | 9.881757  | 15.706725 | 14.474013 |
| Pt | 11.599621 | 10.735681 | 14.171861 |
| Pt | 16.704706 | 15.061666 | 13.915673 |
| Pt | 14.376548 | 16.434965 | 13.924835 |
| Pt | 11.861381 | 17.416115 | 13.792029 |
| Pt | 14.270584 | 11.168326 | 13.845433 |
| Pt | 10.305687 | 13.095966 | 13.744344 |
| Pt | 11.899621 | 8.078079  | 13.558936 |
| Pt | 9.350997  | 9.317006  | 13.493864 |
| Pt | 14.627451 | 13.795964 | 13.216281 |
| Pt | 14.677511 | 8.528119  | 13.219539 |
| Pt | 12.177021 | 14.987280 | 13.153786 |
| Pt | 8.005122  | 11.771774 | 13.049206 |
| Pt | 16.623787 | 10.495264 | 12.605195 |
| Pt | 12.500013 | 12.500018 | 12.499990 |
| Pt | 8.376215  | 14.504721 | 12.394819 |
| Pt | 16.994879 | 13.228244 | 11.950760 |
| Pt | 12.822993 | 10.012704 | 11.846196 |
| Pt | 10.322436 | 16.471886 | 11.780494 |
| Pt | 10.372545 | 11.204035 | 11.783691 |
| Pt | 15.649022 | 15.683018 | 11.506128 |
| Pt | 13.100390 | 16.921947 | 11.441080 |
| Pt | 14.694321 | 11.904001 | 11.255653 |
| Pt | 10.729427 | 13.831708 | 11.154559 |
| Pt | 13.138596 | 7.583858  | 11.208008 |
| Pt | 10.623446 | 8.565020  | 11.075215 |
| Pt | 8.295279  | 9.938377  | 11.084338 |
| Pt | 13.400401 | 14.264337 | 10.828139 |
| Pt | 15.118247 | 9.293230  | 10.525981 |
| Pt | 8.445861  | 12.536976 | 10.355646 |
| Pt | 12.285172 | 11.926036 | 9.981466  |

|    |           |           |           |
|----|-----------|-----------|-----------|
| Pt | 16.837025 | 11.322135 | 10.040618 |
| Pt | 9.000399  | 15.131861 | 9.840707  |
| Pt | 15.718642 | 13.715172 | 9.466960  |
| Pt | 14.279570 | 15.987143 | 9.195605  |
| Pt | 10.064036 | 10.555077 | 9.135685  |
| Pt | 11.594914 | 15.719934 | 9.361821  |
| Pt | 12.612703 | 9.316092  | 9.200728  |
| Pt | 14.558861 | 11.283331 | 8.586398  |
| Pt | 10.435057 | 13.288010 | 8.481236  |
| Pt | 12.075499 | 11.365641 | 7.522194  |
| Pt | 13.213031 | 13.738096 | 8.141778  |

**2<sup>Pt</sup>**

|    |           |           |           |
|----|-----------|-----------|-----------|
| Pt | 11.863721 | 10.908550 | 16.869352 |
| Pt | 13.008038 | 13.205125 | 17.607679 |
| Pt | 14.602067 | 11.350469 | 16.536644 |
| Pt | 10.494046 | 13.384746 | 16.563457 |
| Pt | 10.751261 | 8.757957  | 15.633574 |
| Pt | 15.024126 | 14.115951 | 16.012064 |
| Pt | 12.460213 | 15.482519 | 16.126377 |
| Pt | 13.426598 | 8.960753  | 15.417063 |
| Pt | 9.309429  | 11.059669 | 15.525551 |
| Pt | 16.005186 | 9.606226  | 14.994095 |
| Pt | 8.229704  | 13.483774 | 15.107266 |
| Pt | 12.709954 | 13.158438 | 15.109541 |
| Pt | 16.594652 | 12.235866 | 14.638747 |
| Pt | 9.940936  | 15.523887 | 14.720591 |
| Pt | 11.635711 | 10.713131 | 14.294201 |
| Pt | 16.739145 | 14.857689 | 14.071430 |
| Pt | 14.438883 | 16.250319 | 14.172318 |
| Pt | 11.912032 | 17.371555 | 14.132767 |
| Pt | 14.270226 | 11.139297 | 13.974859 |
| Pt | 10.324730 | 13.028399 | 13.754813 |
| Pt | 11.838227 | 7.923348  | 13.327411 |
| Pt | 9.340295  | 9.204644  | 13.387654 |
| Pt | 14.631417 | 13.726005 | 13.233119 |
| Pt | 14.723839 | 8.388376  | 12.976782 |
| Pt | 12.187907 | 14.947937 | 13.200667 |
| Pt | 8.030191  | 11.700067 | 13.093930 |
| Pt | 16.641434 | 10.383022 | 12.498959 |
| Pt | 12.521446 | 12.418695 | 12.571913 |
| Pt | 8.414929  | 14.481345 | 12.587393 |
| Pt | 17.005262 | 13.149630 | 12.001595 |
| Pt | 12.857115 | 9.894794  | 11.964555 |
| Pt | 10.374110 | 16.450027 | 12.085386 |

|    |           |           |           |
|----|-----------|-----------|-----------|
| Pt | 10.431089 | 11.080578 | 11.876897 |
| Pt | 15.669720 | 15.651995 | 11.703959 |
| Pt | 13.135955 | 16.895412 | 11.749393 |
| Pt | 14.702251 | 11.772572 | 11.359098 |
| Pt | 10.763831 | 13.739650 | 11.173668 |
| Pt | 13.101662 | 7.601089  | 10.943552 |
| Pt | 10.601961 | 8.601477  | 10.854164 |
| Pt | 8.298161  | 10.001727 | 11.018125 |
| Pt | 13.404097 | 14.166906 | 10.854362 |
| Pt | 15.073435 | 9.324046  | 10.310041 |
| Pt | 8.455602  | 12.628816 | 10.478475 |
| Pt | 12.315221 | 11.796689 | 10.040861 |
| Pt | 16.800011 | 11.374591 | 9.983494  |
| Pt | 9.021182  | 15.248166 | 10.076897 |
| Pt | 15.713017 | 13.800263 | 9.594679  |
| Pt | 14.285563 | 16.097794 | 9.436193  |
| Pt | 10.025090 | 10.743479 | 9.101114  |
| Pt | 11.605762 | 15.873760 | 9.631303  |
| Pt | 12.576474 | 9.415419  | 9.037956  |
| Pt | 14.530725 | 11.470531 | 8.552756  |
| Pt | 10.442001 | 13.491570 | 8.582716  |
| Pt | 12.038427 | 11.610806 | 7.529745  |
| Pt | 13.171783 | 13.932241 | 8.251434  |
| O  | 12.264100 | 17.304644 | 16.918764 |
| O  | 11.995081 | 18.213469 | 15.910289 |

**TS2/3a<sup>Pt</sup>**

|    |           |           |           |
|----|-----------|-----------|-----------|
| Pt | 11.986125 | 11.347818 | 16.861744 |
| Pt | 13.068570 | 13.752468 | 17.409582 |
| Pt | 14.688828 | 11.790941 | 16.447113 |
| Pt | 10.548772 | 13.851826 | 16.399775 |
| Pt | 10.907782 | 8.861829  | 15.945538 |
| Pt | 15.033998 | 14.519067 | 15.739851 |
| Pt | 12.461267 | 15.753110 | 15.710087 |
| Pt | 13.514158 | 9.323018  | 15.578997 |
| Pt | 9.214372  | 11.441001 | 15.660713 |
| Pt | 16.096134 | 9.920745  | 15.082006 |
| Pt | 8.184574  | 13.843651 | 14.973629 |
| Pt | 16.594740 | 12.516122 | 14.527878 |
| Pt | 9.943951  | 15.772358 | 14.388429 |
| Pt | 16.752781 | 15.095494 | 13.755234 |
| Pt | 14.430523 | 16.464516 | 13.799642 |
| Pt | 11.917795 | 17.457169 | 13.679636 |
| Pt | 11.984739 | 8.144513  | 13.600445 |
| Pt | 9.411750  | 9.299600  | 13.563681 |
| Pt | 14.736694 | 8.532761  | 13.180367 |



|    |           |           |           |
|----|-----------|-----------|-----------|
| Pt | 8.028019  | 11.800313 | 13.133517 |
| Pt | 16.613800 | 10.514410 | 12.510956 |
| Pt | 8.416524  | 14.539962 | 12.400806 |
| Pt | 16.989088 | 13.231050 | 11.820700 |
| Pt | 10.339977 | 16.496029 | 11.706265 |
| Pt | 15.649011 | 15.673380 | 11.354959 |
| Pt | 13.105555 | 16.921135 | 11.324677 |
| Pt | 13.152710 | 7.566337  | 11.196356 |
| Pt | 10.623675 | 8.553282  | 11.141690 |
| Pt | 8.293001  | 9.925797  | 11.185968 |
| Pt | 15.087713 | 9.296047  | 10.499701 |
| Pt | 8.419809  | 12.516418 | 10.437642 |
| Pt | 16.786198 | 11.305124 | 9.938107  |
| Pt | 8.968509  | 15.104980 | 9.834084  |
| Pt | 15.666477 | 13.685575 | 9.351000  |
| Pt | 14.225004 | 15.958227 | 9.065772  |
| Pt | 10.007730 | 10.518952 | 9.188043  |
| Pt | 11.545782 | 15.679463 | 9.292475  |
| Pt | 12.541401 | 9.297126  | 9.220554  |
| Pt | 14.479345 | 11.241887 | 8.537389  |
| Pt | 10.362308 | 13.226427 | 8.491720  |
| Pt | 11.980962 | 11.304838 | 7.518236  |
| Pt | 13.142684 | 13.681979 | 8.079606  |
| Pt | 12.189066 | 14.999480 | 13.104527 |
| Pt | 12.785038 | 13.109505 | 14.974345 |
| Pt | 10.315070 | 13.041453 | 13.841133 |
| Pt | 10.708559 | 13.834049 | 11.176847 |
| Pt | 13.363485 | 14.280624 | 10.752512 |
| Pt | 14.640048 | 13.817735 | 13.119991 |
| Pt | 12.823680 | 10.018773 | 11.860029 |
| Pt | 11.525412 | 10.744237 | 14.277519 |
| Pt | 12.234515 | 11.918682 | 9.978065  |
| Pt | 10.379787 | 11.203504 | 11.823351 |
| Pt | 14.276274 | 11.178972 | 13.800037 |
| Pt | 14.660679 | 11.921381 | 11.189229 |
| Pt | 12.487294 | 12.508292 | 12.493458 |
| O  | 8.641129  | 10.470038 | 17.112967 |
| O  | 9.662180  | 8.904431  | 17.269732 |

### 3a<sup>Pt</sup>

|    |           |           |           |
|----|-----------|-----------|-----------|
| Pt | 11.905089 | 11.218673 | 16.821877 |
| Pt | 12.942627 | 13.621964 | 17.384348 |
| Pt | 14.546774 | 11.717269 | 16.414354 |
| Pt | 10.467925 | 13.868380 | 16.365381 |
| Pt | 10.743770 | 8.936489  | 15.758989 |

|    |           |           |           |
|----|-----------|-----------|-----------|
| Pt | 14.897214 | 14.407331 | 15.769802 |
| Pt | 12.392863 | 15.631779 | 15.705826 |
| Pt | 13.416810 | 9.355161  | 15.535754 |
| Pt | 9.244100  | 11.242673 | 15.414330 |
| Pt | 15.973478 | 9.913620  | 15.076134 |
| Pt | 8.229700  | 13.664825 | 14.891561 |
| Pt | 16.485361 | 12.478954 | 14.578848 |
| Pt | 9.955021  | 15.653980 | 14.416400 |
| Pt | 16.658691 | 15.039806 | 13.872663 |
| Pt | 14.352118 | 16.363594 | 13.881794 |
| Pt | 11.885908 | 17.361826 | 13.744646 |
| Pt | 11.932992 | 8.192380  | 13.498018 |
| Pt | 9.430360  | 9.391187  | 13.427078 |
| Pt | 14.656761 | 8.603471  | 13.166416 |
| Pt | 8.101721  | 11.775753 | 13.005320 |
| Pt | 16.551146 | 10.552306 | 12.555819 |
| Pt | 8.475459  | 14.465674 | 12.373109 |
| Pt | 16.909334 | 13.229299 | 11.934749 |
| Pt | 10.370498 | 16.399784 | 11.775833 |
| Pt | 15.593517 | 15.634900 | 11.504938 |
| Pt | 13.102711 | 16.837734 | 11.434964 |
| Pt | 13.154893 | 7.663760  | 11.178918 |
| Pt | 10.680350 | 8.639473  | 11.063064 |
| Pt | 8.379458  | 9.982399  | 11.059352 |
| Pt | 15.085515 | 9.382372  | 10.535658 |
| Pt | 8.538874  | 12.551093 | 10.375631 |
| Pt | 16.792551 | 11.366808 | 10.032197 |
| Pt | 9.061371  | 15.108906 | 9.854094  |
| Pt | 15.670243 | 13.713596 | 9.505953  |
| Pt | 14.265758 | 15.946598 | 9.220908  |
| Pt | 10.146724 | 10.610374 | 9.168151  |
| Pt | 11.626281 | 15.671044 | 9.406462  |
| Pt | 12.624722 | 9.404688  | 9.233962  |
| Pt | 14.532667 | 11.334629 | 8.637070  |
| Pt | 10.496478 | 13.287512 | 8.542692  |
| Pt | 12.108465 | 11.409257 | 7.554399  |
| Pt | 13.208164 | 13.736021 | 8.203560  |
| Pt | 12.195257 | 14.870972 | 13.116825 |
| Pt | 12.698802 | 13.026905 | 14.895922 |
| Pt | 10.415154 | 13.047693 | 13.687940 |
| Pt | 10.814343 | 13.772840 | 11.212269 |
| Pt | 13.365677 | 14.193699 | 10.892380 |
| Pt | 14.530842 | 13.739011 | 13.178189 |
| Pt | 12.814069 | 10.135110 | 11.865518 |
| Pt | 11.632170 | 10.779964 | 14.110972 |
| Pt | 12.303684 | 11.960567 | 10.084105 |
| Pt | 10.488627 | 11.262719 | 11.807073 |
| Pt | 14.186714 | 11.229083 | 13.763289 |

|    |           |           |           |
|----|-----------|-----------|-----------|
| Pt | 14.599591 | 11.939709 | 11.298573 |
| Pt | 12.526562 | 12.539188 | 12.450306 |
| O  | 10.019164 | 12.018782 | 17.181459 |
| O  | 10.012427 | 8.056726  | 17.129309 |

**3b<sup>Pt</sup>**

|    |           |           |           |
|----|-----------|-----------|-----------|
| Pt | 11.850120 | 11.166642 | 16.885086 |
| Pt | 12.953308 | 13.531457 | 17.498835 |
| Pt | 14.555171 | 11.601137 | 16.542591 |
| Pt | 10.412922 | 13.562729 | 16.426071 |
| Pt | 10.733375 | 8.954552  | 15.724914 |
| Pt | 15.048560 | 14.302452 | 15.854198 |
| Pt | 12.370704 | 15.854460 | 15.928981 |
| Pt | 13.405543 | 9.161498  | 15.528388 |
| Pt | 9.269942  | 11.223202 | 15.491157 |
| Pt | 15.981606 | 9.785122  | 15.076901 |
| Pt | 8.175602  | 13.622149 | 14.931391 |
| Pt | 12.697278 | 13.467166 | 15.006001 |
| Pt | 16.582253 | 12.383132 | 14.591771 |
| Pt | 9.866365  | 15.680112 | 14.447795 |
| Pt | 11.621682 | 10.886896 | 14.336326 |
| Pt | 16.736706 | 14.983529 | 13.872560 |
| Pt | 14.425076 | 16.382385 | 13.912155 |
| Pt | 11.869522 | 17.459742 | 13.812537 |
| Pt | 14.234036 | 11.281184 | 13.998826 |
| Pt | 10.339936 | 13.186842 | 13.690959 |
| Pt | 11.848874 | 8.003039  | 13.493548 |
| Pt | 9.342917  | 9.278761  | 13.454874 |
| Pt | 14.643805 | 13.792862 | 13.092632 |
| Pt | 14.703122 | 8.480262  | 13.127403 |
| Pt | 12.220994 | 15.066349 | 12.955239 |
| Pt | 8.026666  | 11.739852 | 13.022661 |
| Pt | 16.641417 | 10.443870 | 12.560892 |
| Pt | 12.514925 | 12.492952 | 12.524499 |
| Pt | 8.389932  | 14.479239 | 12.360977 |
| Pt | 17.001715 | 13.159707 | 11.906537 |
| Pt | 12.808670 | 9.921139  | 12.040188 |
| Pt | 10.335898 | 16.451622 | 11.770771 |
| Pt | 10.411262 | 11.136338 | 11.897254 |
| Pt | 15.656190 | 15.659417 | 11.471291 |
| Pt | 13.133420 | 16.924616 | 11.409225 |
| Pt | 14.681869 | 11.725513 | 11.342094 |
| Pt | 10.768294 | 13.732128 | 11.066839 |
| Pt | 13.119986 | 7.563519  | 11.136260 |
| Pt | 10.629860 | 8.560715  | 10.986681 |
| Pt | 8.323064  | 9.938822  | 11.044609 |

|    |           |           |           |
|----|-----------|-----------|-----------|
| Pt | 13.426086 | 14.098976 | 10.679884 |
| Pt | 15.084052 | 9.251294  | 10.431656 |
| Pt | 8.478380  | 12.528798 | 10.356394 |
| Pt | 12.297174 | 11.717072 | 10.015811 |
| Pt | 16.803278 | 11.286089 | 9.994894  |
| Pt | 9.018226  | 15.124419 | 9.820864  |
| Pt | 15.729743 | 13.687953 | 9.466635  |
| Pt | 14.290874 | 15.968897 | 9.171620  |
| Pt | 10.061531 | 10.572128 | 9.109363  |
| Pt | 11.611455 | 15.731888 | 9.366571  |
| Pt | 12.609750 | 9.279521  | 9.135566  |
| Pt | 14.543037 | 11.298899 | 8.559218  |
| Pt | 10.466467 | 13.293132 | 8.462152  |
| Pt | 12.072765 | 11.375708 | 7.499719  |
| Pt | 13.198191 | 13.733162 | 8.096962  |
| O  | 11.885620 | 18.564241 | 15.465596 |
| O  | 12.126347 | 17.771706 | 16.559542 |
| H  | 12.652670 | 15.283026 | 17.549553 |

### TS3/4b<sup>Pt</sup>

|    |           |           |           |
|----|-----------|-----------|-----------|
| Pt | 11.787927 | 11.346121 | 16.847166 |
| Pt | 12.939083 | 13.705820 | 17.465418 |
| Pt | 14.584069 | 11.760825 | 16.530926 |
| Pt | 10.451964 | 13.803954 | 16.449400 |
| Pt | 10.735834 | 9.089578  | 15.833881 |
| Pt | 14.950956 | 14.525827 | 15.853411 |
| Pt | 12.397935 | 15.760767 | 15.862637 |
| Pt | 13.407935 | 9.354227  | 15.683688 |
| Pt | 9.311542  | 11.341434 | 15.536642 |
| Pt | 15.990257 | 9.916395  | 15.184472 |
| Pt | 8.192249  | 13.726049 | 14.944283 |
| Pt | 12.867424 | 13.009171 | 15.028191 |
| Pt | 16.555971 | 12.483939 | 14.684404 |
| Pt | 9.890747  | 15.751368 | 14.433092 |
| Pt | 11.651013 | 10.692882 | 14.076365 |
| Pt | 16.714825 | 15.051983 | 13.885514 |
| Pt | 14.436002 | 16.447582 | 13.886915 |
| Pt | 11.900366 | 17.495041 | 13.795328 |
| Pt | 14.293493 | 11.022629 | 13.661782 |
| Pt | 10.432841 | 13.145245 | 13.905069 |
| Pt | 11.914993 | 8.094579  | 13.609411 |
| Pt | 9.360628  | 9.362670  | 13.524339 |
| Pt | 14.718780 | 13.654390 | 13.187303 |
| Pt | 14.664206 | 8.498996  | 13.270350 |
| Pt | 12.298478 | 15.050861 | 13.276493 |

|    |           |           |           |
|----|-----------|-----------|-----------|
| Pt | 8.013247  | 11.816827 | 13.071297 |
| Pt | 16.655720 | 10.525274 | 12.623724 |
| Pt | 12.513569 | 12.520947 | 12.497499 |
| Pt | 8.379130  | 14.513567 | 12.384050 |
| Pt | 16.992071 | 13.215141 | 11.918138 |
| Pt | 12.663373 | 10.019176 | 11.635822 |
| Pt | 10.364405 | 16.525496 | 11.760379 |
| Pt | 10.294592 | 11.371947 | 11.834880 |
| Pt | 15.660074 | 15.674752 | 11.481575 |
| Pt | 13.098585 | 16.929413 | 11.414947 |
| Pt | 14.580242 | 11.857020 | 11.100087 |
| Pt | 10.729785 | 13.999018 | 11.311826 |
| Pt | 13.144386 | 7.564381  | 11.268215 |
| Pt | 10.594272 | 8.530364  | 11.137439 |
| Pt | 8.317211  | 9.956653  | 11.117396 |
| Pt | 13.409657 | 14.320013 | 10.902574 |
| Pt | 15.133736 | 9.249165  | 10.597064 |
| Pt | 8.457737  | 12.540839 | 10.323782 |
| Pt | 12.129242 | 12.089444 | 9.954207  |
| Pt | 16.813375 | 11.286394 | 10.054639 |
| Pt | 9.022207  | 15.121262 | 9.822013  |
| Pt | 15.711761 | 13.683990 | 9.462943  |
| Pt | 14.282720 | 15.951168 | 9.166506  |
| Pt | 10.085895 | 10.494298 | 9.174100  |
| Pt | 11.608558 | 15.681473 | 9.314978  |
| Pt | 12.640476 | 9.255589  | 9.172121  |
| Pt | 14.543303 | 11.225174 | 8.563599  |
| Pt | 10.400735 | 13.281046 | 8.448930  |
| Pt | 12.068160 | 11.314794 | 7.546282  |
| Pt | 13.230352 | 13.698819 | 8.140217  |
| O  | 11.784534 | 19.070745 | 15.018636 |
| O  | 11.957804 | 18.840200 | 16.305573 |
| H  | 12.212134 | 17.301168 | 16.409611 |

#### 4b<sup>Pt</sup>

|    |           |           |           |
|----|-----------|-----------|-----------|
| Pt | 11.838165 | 10.982711 | 16.768078 |
| Pt | 12.995492 | 13.288309 | 17.501873 |
| Pt | 14.588494 | 11.411941 | 16.440996 |
| Pt | 10.494220 | 13.465649 | 16.484970 |
| Pt | 10.725403 | 8.821754  | 15.587814 |
| Pt | 15.000004 | 14.168778 | 15.931848 |
| Pt | 12.458200 | 15.480850 | 15.974633 |
| Pt | 13.406101 | 9.036336  | 15.383966 |
| Pt | 9.314486  | 11.136187 | 15.454324 |
| Pt | 15.990546 | 9.645132  | 14.941510 |

|    |           |           |           |
|----|-----------|-----------|-----------|
| Pt | 8.224113  | 13.568068 | 15.039195 |
| Pt | 12.689299 | 13.059446 | 14.998275 |
| Pt | 16.580429 | 12.276704 | 14.566575 |
| Pt | 9.959180  | 15.595344 | 14.672777 |
| Pt | 11.635270 | 10.690677 | 14.129827 |
| Pt | 16.724958 | 14.907396 | 14.001218 |
| Pt | 14.403826 | 16.311924 | 14.122545 |
| Pt | 11.901335 | 17.401209 | 14.052417 |
| Pt | 14.289230 | 11.161213 | 13.835576 |
| Pt | 10.315175 | 13.051968 | 13.698967 |
| Pt | 11.839208 | 7.980888  | 13.283268 |
| Pt | 9.337430  | 9.271571  | 13.327233 |
| Pt | 14.588484 | 13.808806 | 13.211729 |
| Pt | 14.676285 | 8.397877  | 12.955381 |
| Pt | 12.144556 | 15.050533 | 13.174852 |
| Pt | 8.022335  | 11.773881 | 13.029149 |
| Pt | 16.591806 | 10.392473 | 12.429760 |
| Pt | 12.508307 | 12.476517 | 12.481882 |
| Pt | 8.404835  | 14.554034 | 12.527273 |
| Pt | 16.993225 | 13.180592 | 11.944258 |
| Pt | 12.896505 | 9.936027  | 11.818151 |
| Pt | 10.330442 | 16.520880 | 11.969377 |
| Pt | 10.426412 | 11.140460 | 11.749184 |
| Pt | 15.677971 | 15.676275 | 11.625392 |
| Pt | 13.165431 | 16.958544 | 11.633017 |
| Pt | 14.703943 | 11.915563 | 11.259048 |
| Pt | 10.733169 | 13.806046 | 11.142269 |
| Pt | 13.073671 | 7.600094  | 10.893099 |
| Pt | 10.576816 | 8.636034  | 10.833428 |
| Pt | 8.269557  | 10.054263 | 10.968902 |
| Pt | 13.365149 | 14.268621 | 10.835251 |
| Pt | 15.056777 | 9.344648  | 10.280525 |
| Pt | 8.434859  | 12.670957 | 10.398557 |
| Pt | 12.321761 | 11.886677 | 9.967552  |
| Pt | 16.796337 | 11.383124 | 9.926424  |
| Pt | 9.015331  | 15.276997 | 10.000435 |
| Pt | 15.702873 | 13.806828 | 9.503232  |
| Pt | 14.296730 | 16.100864 | 9.351008  |
| Pt | 10.011278 | 10.765467 | 9.041392  |
| Pt | 11.605274 | 15.895025 | 9.535569  |
| Pt | 12.541911 | 9.445594  | 8.998899  |
| Pt | 14.519295 | 11.454464 | 8.490484  |
| Pt | 10.430124 | 13.507968 | 8.528551  |
| Pt | 12.022623 | 11.620873 | 7.463726  |
| Pt | 13.185163 | 13.932734 | 8.192552  |
| O  | 11.672803 | 19.496107 | 15.938406 |
| O  | 11.636453 | 19.268227 | 14.503399 |
| H  | 10.714019 | 19.598013 | 16.133303 |

**TS4/5b<sup>Pt</sup>**

|    |           |           |           |
|----|-----------|-----------|-----------|
| Pt | 11.838086 | 11.047694 | 16.805220 |
| Pt | 12.989952 | 13.366725 | 17.464109 |
| Pt | 14.578760 | 11.466240 | 16.475286 |
| Pt | 10.477383 | 13.518108 | 16.443823 |
| Pt | 10.734491 | 8.885697  | 15.599707 |
| Pt | 15.012253 | 14.213101 | 15.900076 |
| Pt | 12.462032 | 15.592480 | 15.964584 |
| Pt | 13.399722 | 9.070767  | 15.373895 |
| Pt | 9.297100  | 11.187501 | 15.439446 |
| Pt | 15.967573 | 9.694405  | 14.951088 |
| Pt | 8.223087  | 13.607824 | 14.982984 |
| Pt | 12.645228 | 13.250847 | 14.964149 |
| Pt | 16.588774 | 12.315116 | 14.548509 |
| Pt | 9.951835  | 15.626680 | 14.615268 |
| Pt | 11.634895 | 10.824163 | 14.225984 |
| Pt | 16.711506 | 14.926661 | 13.954745 |
| Pt | 14.420779 | 16.357460 | 14.069387 |
| Pt | 11.930559 | 17.378786 | 14.014438 |
| Pt | 14.276801 | 11.278087 | 13.920786 |
| Pt | 10.279675 | 13.107475 | 13.584910 |
| Pt | 11.811033 | 7.996099  | 13.304790 |
| Pt | 9.327124  | 9.293101  | 13.357292 |
| Pt | 14.541142 | 13.892782 | 13.164167 |
| Pt | 14.726916 | 8.385655  | 12.972614 |
| Pt | 12.066076 | 15.087596 | 12.996747 |
| Pt | 8.025404  | 11.777395 | 13.007225 |
| Pt | 16.606289 | 10.409353 | 12.452522 |
| Pt | 12.496214 | 12.508602 | 12.465765 |
| Pt | 8.386832  | 14.586501 | 12.465258 |
| Pt | 16.979671 | 13.188749 | 11.924777 |
| Pt | 12.950225 | 9.913560  | 11.978850 |
| Pt | 10.289737 | 16.575628 | 11.906165 |
| Pt | 10.483596 | 11.048328 | 11.787601 |
| Pt | 15.672927 | 15.675772 | 11.568578 |
| Pt | 13.188269 | 16.985512 | 11.592405 |
| Pt | 14.700827 | 11.883396 | 11.319812 |
| Pt | 10.703710 | 13.706376 | 10.998527 |
| Pt | 13.072366 | 7.617356  | 10.916764 |
| Pt | 10.580567 | 8.612418  | 10.829761 |
| Pt | 8.293103  | 10.051306 | 10.967962 |
| Pt | 13.323063 | 14.224826 | 10.737608 |
| Pt | 15.051163 | 9.346215  | 10.298682 |
| Pt | 8.406239  | 12.659958 | 10.382865 |
| Pt | 12.353849 | 11.774381 | 9.978210  |
| Pt | 16.779051 | 11.373542 | 9.938249  |

|    |           |           |           |
|----|-----------|-----------|-----------|
| Pt | 9.024527  | 15.274527 | 9.950213  |
| Pt | 15.686706 | 13.786851 | 9.493713  |
| Pt | 14.281507 | 16.085966 | 9.310040  |
| Pt | 10.004926 | 10.773269 | 9.044815  |
| Pt | 11.599920 | 15.905197 | 9.494266  |
| Pt | 12.546459 | 9.401189  | 9.004217  |
| Pt | 14.522243 | 11.440926 | 8.492167  |
| Pt | 10.430038 | 13.504929 | 8.441566  |
| Pt | 12.021895 | 11.586989 | 7.471801  |
| Pt | 13.185413 | 13.904715 | 8.140101  |
| O  | 11.980372 | 18.548588 | 16.530476 |
| O  | 11.662377 | 18.946508 | 15.155548 |
| H  | 11.074439 | 18.443581 | 16.901791 |

### 5b<sup>Pt</sup>

|    |           |           |           |
|----|-----------|-----------|-----------|
| Pt | 11.854931 | 10.939198 | 16.755157 |
| Pt | 13.014065 | 13.226685 | 17.550636 |
| Pt | 14.589284 | 11.364412 | 16.441525 |
| Pt | 10.465759 | 13.412865 | 16.516672 |
| Pt | 10.727764 | 8.793203  | 15.563414 |
| Pt | 15.046728 | 14.112502 | 15.963167 |
| Pt | 12.439164 | 15.524136 | 16.017941 |
| Pt | 13.413097 | 9.005161  | 15.356623 |
| Pt | 9.319391  | 11.110925 | 15.463765 |
| Pt | 16.000427 | 9.626694  | 14.917202 |
| Pt | 8.199420  | 13.539785 | 15.052451 |
| Pt | 12.677622 | 13.087191 | 15.076884 |
| Pt | 16.588991 | 12.258337 | 14.558485 |
| Pt | 9.876604  | 15.607130 | 14.641923 |
| Pt | 11.635942 | 10.679926 | 14.121511 |
| Pt | 16.745817 | 14.902004 | 14.011806 |
| Pt | 14.438081 | 16.357180 | 14.065291 |
| Pt | 11.837111 | 17.541853 | 13.927471 |
| Pt | 14.276592 | 11.153949 | 13.847174 |
| Pt | 10.303534 | 13.040750 | 13.739570 |
| Pt | 11.845892 | 7.990427  | 13.249842 |
| Pt | 9.335767  | 9.279862  | 13.309314 |
| Pt | 14.589866 | 13.817833 | 13.289781 |
| Pt | 14.671405 | 8.411839  | 12.922443 |
| Pt | 12.156507 | 15.074982 | 13.397567 |
| Pt | 8.022412  | 11.759122 | 13.033436 |
| Pt | 16.592724 | 10.404447 | 12.410967 |
| Pt | 12.510499 | 12.516869 | 12.549038 |
| Pt | 8.382584  | 14.543562 | 12.532815 |
| Pt | 16.993118 | 13.182998 | 11.944428 |



|    |           |           |           |
|----|-----------|-----------|-----------|
| Pt | 12.896712 | 9.978867  | 11.792735 |
| Pt | 10.347999 | 16.478580 | 11.948476 |
| Pt | 10.438309 | 11.175178 | 11.746180 |
| Pt | 15.693016 | 15.681541 | 11.630614 |
| Pt | 13.126272 | 16.924847 | 11.624775 |
| Pt | 14.705411 | 11.956063 | 11.290338 |
| Pt | 10.751647 | 13.870255 | 11.225215 |
| Pt | 13.068181 | 7.630402  | 10.869507 |
| Pt | 10.573209 | 8.660993  | 10.824421 |
| Pt | 8.272099  | 10.065075 | 10.965782 |
| Pt | 13.376410 | 14.327711 | 10.934467 |
| Pt | 15.046793 | 9.370741  | 10.263783 |
| Pt | 8.448231  | 12.682943 | 10.429597 |
| Pt | 12.328759 | 11.984761 | 10.000085 |
| Pt | 16.783680 | 11.402151 | 9.919815  |
| Pt | 8.996950  | 15.275255 | 9.992458  |
| Pt | 15.692644 | 13.827872 | 9.528472  |
| Pt | 14.296903 | 16.117935 | 9.351203  |
| Pt | 10.021468 | 10.789607 | 9.057043  |
| Pt | 11.598932 | 15.882958 | 9.517142  |
| Pt | 12.529556 | 9.497366  | 9.004934  |
| Pt | 14.502098 | 11.477867 | 8.506757  |
| Pt | 10.433920 | 13.513165 | 8.567280  |
| Pt | 12.017777 | 11.653230 | 7.477702  |
| Pt | 13.178873 | 13.950506 | 8.230371  |
| O  | 12.484087 | 16.771349 | 17.516336 |
| O  | 11.622215 | 19.190565 | 14.569485 |
| H  | 11.562155 | 16.917961 | 17.813406 |

## 5<sup>Pt</sup>

|    |           |           |           |
|----|-----------|-----------|-----------|
| Pt | 11.772223 | 11.286767 | 16.813820 |
| Pt | 12.948863 | 13.570378 | 17.571774 |
| Pt | 14.626211 | 11.661180 | 16.496311 |
| Pt | 10.415701 | 13.745412 | 16.387058 |
| Pt | 10.711137 | 9.029821  | 15.780219 |
| Pt | 15.103112 | 14.364502 | 15.923015 |
| Pt | 12.235984 | 15.715443 | 15.863556 |
| Pt | 13.407606 | 9.270306  | 15.643665 |
| Pt | 9.258087  | 11.268039 | 15.493952 |
| Pt | 15.993071 | 9.840198  | 15.108339 |
| Pt | 8.157253  | 13.662388 | 14.884658 |
| Pt | 12.872437 | 13.090192 | 15.108374 |
| Pt | 16.572153 | 12.435798 | 14.649751 |
| Pt | 9.850065  | 15.694245 | 14.413494 |
| Pt | 11.734385 | 10.719328 | 14.174329 |

|    |           |           |           |
|----|-----------|-----------|-----------|
| Pt | 16.736992 | 15.033669 | 13.858003 |
| Pt | 14.437981 | 16.557653 | 13.755915 |
| Pt | 11.826701 | 17.420765 | 13.714992 |
| Pt | 14.365396 | 11.184220 | 13.712214 |
| Pt | 10.386810 | 13.055685 | 13.858485 |
| Pt | 11.896243 | 8.098240  | 13.530888 |
| Pt | 9.360734  | 9.340271  | 13.471003 |
| Pt | 14.645203 | 13.816507 | 13.170674 |
| Pt | 14.638283 | 8.525211  | 13.193403 |
| Pt | 12.228444 | 14.976758 | 13.268227 |
| Pt | 8.003751  | 11.776773 | 12.980411 |
| Pt | 16.631897 | 10.475621 | 12.553616 |
| Pt | 12.517826 | 12.530902 | 12.508800 |
| Pt | 8.347326  | 14.488396 | 12.332946 |
| Pt | 16.961353 | 13.185741 | 11.909971 |
| Pt | 12.810884 | 10.062597 | 11.765538 |
| Pt | 10.334912 | 16.437996 | 11.715681 |
| Pt | 10.371099 | 11.220604 | 11.850984 |
| Pt | 15.628487 | 15.660526 | 11.440908 |
| Pt | 13.101896 | 16.905489 | 11.382940 |
| Pt | 14.614527 | 11.957778 | 11.085699 |
| Pt | 10.659869 | 13.845735 | 11.255542 |
| Pt | 13.119350 | 7.587972  | 11.191149 |
| Pt | 10.627549 | 8.572834  | 11.055549 |
| Pt | 8.314811  | 9.923150  | 11.052987 |
| Pt | 13.294540 | 14.309388 | 10.821031 |
| Pt | 15.102442 | 9.275509  | 10.522520 |
| Pt | 8.470878  | 12.494600 | 10.297471 |
| Pt | 12.151106 | 11.985385 | 9.921968  |
| Pt | 16.817232 | 11.287183 | 10.004802 |
| Pt | 9.006407  | 15.084642 | 9.774632  |
| Pt | 15.724723 | 13.691039 | 9.413697  |
| Pt | 14.259473 | 15.937406 | 9.137232  |
| Pt | 10.063046 | 10.517339 | 9.107988  |
| Pt | 11.573732 | 15.667240 | 9.278864  |
| Pt | 12.621686 | 9.301469  | 9.179482  |
| Pt | 14.541666 | 11.234466 | 8.535492  |
| Pt | 10.425322 | 13.258219 | 8.404941  |
| Pt | 12.067091 | 11.309205 | 7.480124  |
| Pt | 13.221593 | 13.673110 | 8.095119  |
| O  | 14.242436 | 16.245848 | 15.793703 |
| O  | 13.206640 | 14.149427 | 19.408442 |
| H  | 14.067406 | 13.821836 | 19.740652 |

**Ru<sub>13</sub>@Pt<sub>42</sub>**

|    |           |           |           |
|----|-----------|-----------|-----------|
| Pt | 11.800611 | 11.285624 | 16.775110 |
| Pt | 12.918086 | 13.617216 | 17.402222 |
| Pt | 14.525551 | 11.727075 | 16.442154 |
| Pt | 10.480458 | 13.693535 | 16.338856 |
| Pt | 10.747552 | 9.065827  | 15.754241 |
| Pt | 14.889524 | 14.407799 | 15.800142 |
| Pt | 12.389524 | 15.623183 | 15.736353 |
| Pt | 13.387897 | 9.341546  | 15.578307 |
| Pt | 9.342814  | 11.307976 | 15.475139 |
| Pt | 15.946452 | 9.908091  | 15.118948 |
| Pt | 8.228866  | 13.659911 | 14.922033 |
| Pt | 16.476866 | 12.463820 | 14.603353 |
| Pt | 9.931745  | 15.645565 | 14.436403 |
| Pt | 16.640800 | 15.022798 | 13.894121 |
| Pt | 14.340724 | 16.359802 | 13.897649 |
| Pt | 11.871159 | 17.341475 | 13.772406 |
| Pt | 11.911068 | 8.162424  | 13.538795 |
| Pt | 9.411124  | 9.377774  | 13.474944 |
| Pt | 14.635984 | 8.603902  | 13.205725 |
| Pt | 8.090947  | 11.785674 | 13.038681 |
| Pt | 16.545078 | 10.533567 | 12.603176 |
| Pt | 8.454929  | 14.466436 | 12.396821 |
| Pt | 16.909061 | 13.214331 | 11.961214 |
| Pt | 10.363924 | 16.396103 | 11.794271 |
| Pt | 15.588884 | 15.622230 | 11.525051 |
| Pt | 13.088940 | 16.837580 | 11.461301 |
| Pt | 13.128848 | 7.658431  | 11.227590 |
| Pt | 10.659184 | 8.640103  | 11.102347 |
| Pt | 8.359107  | 9.977206  | 11.105874 |
| Pt | 15.068264 | 9.354439  | 10.563593 |
| Pt | 8.523244  | 12.536284 | 10.396643 |
| Pt | 16.771143 | 11.340094 | 10.077963 |
| Pt | 9.053556  | 15.091914 | 9.881148  |
| Pt | 15.657194 | 13.692029 | 9.524857  |
| Pt | 14.252456 | 15.934176 | 9.245755  |
| Pt | 10.110485 | 10.592206 | 9.199853  |
| Pt | 11.612110 | 15.658458 | 9.421688  |
| Pt | 12.610483 | 9.376821  | 9.263642  |
| Pt | 14.519550 | 11.306468 | 8.661039  |
| Pt | 10.474458 | 13.272929 | 8.557941  |
| Pt | 12.081923 | 11.382789 | 7.597775  |
| Pt | 13.199396 | 13.714380 | 8.224886  |
| Ru | 12.191883 | 14.871851 | 13.123362 |
| Ru | 12.704778 | 13.047335 | 14.901608 |
| Ru | 10.407529 | 13.068233 | 13.686522 |

|    |           |           |           |
|----|-----------|-----------|-----------|
| Ru | 10.811600 | 13.769765 | 11.216955 |
| Ru | 13.358545 | 14.182398 | 10.905766 |
| Ru | 14.528630 | 13.735904 | 13.183006 |
| Ru | 12.808125 | 10.128153 | 11.876635 |
| Ru | 11.641462 | 10.817605 | 14.094229 |
| Ru | 12.295230 | 11.952669 | 10.098388 |
| Ru | 10.471377 | 11.264100 | 11.816989 |
| Ru | 14.188409 | 11.230239 | 13.783041 |
| Ru | 14.592479 | 11.931771 | 11.313475 |
| Ru | 12.500005 | 12.500002 | 12.499998 |

## 2RuPt

|    |           |           |           |
|----|-----------|-----------|-----------|
| Pt | 11.809970 | 11.306595 | 16.775135 |
| Pt | 12.932801 | 13.649814 | 17.379589 |
| Pt | 14.549726 | 11.744758 | 16.420254 |
| Pt | 10.478045 | 13.723280 | 16.315327 |
| Pt | 10.720995 | 9.014142  | 15.784359 |
| Pt | 14.894583 | 14.427831 | 15.763953 |
| Pt | 12.400819 | 15.639630 | 15.699670 |
| Pt | 13.412282 | 9.347318  | 15.521334 |
| Pt | 9.333212  | 11.329687 | 15.416784 |
| Pt | 15.962203 | 9.927511  | 15.082825 |
| Pt | 8.234195  | 13.683455 | 14.883555 |
| Pt | 16.480574 | 12.482424 | 14.572380 |
| Pt | 9.943340  | 15.659574 | 14.403650 |
| Pt | 16.654194 | 15.042132 | 13.868019 |
| Pt | 14.348060 | 16.375341 | 13.864305 |
| Pt | 11.877344 | 17.363852 | 13.744861 |
| Pt | 11.904187 | 8.210365  | 13.521464 |
| Pt | 9.453680  | 9.401814  | 13.458803 |
| Pt | 14.647503 | 8.615669  | 13.167596 |
| Pt | 8.094203  | 11.800723 | 12.998754 |
| Pt | 16.559517 | 10.546630 | 12.567022 |
| Pt | 8.456926  | 14.484626 | 12.357977 |
| Pt | 16.913744 | 13.225823 | 11.932272 |
| Pt | 10.370563 | 16.405954 | 11.763434 |
| Pt | 15.597563 | 15.631313 | 11.499192 |
| Pt | 13.091109 | 16.849508 | 11.434565 |
| Pt | 13.136056 | 7.658012  | 11.194491 |
| Pt | 10.665860 | 8.651837  | 11.080904 |
| Pt | 8.355997  | 9.981035  | 11.071267 |
| Pt | 15.079662 | 9.368277  | 10.546813 |
| Pt | 8.528369  | 12.552465 | 10.377791 |
| Pt | 16.784515 | 11.354097 | 10.045488 |
| Pt | 9.058031  | 15.109411 | 9.846049  |

|    |           |           |           |
|----|-----------|-----------|-----------|
| Pt | 15.664617 | 13.707699 | 9.495966  |
| Pt | 14.263029 | 15.954061 | 9.225433  |
| Pt | 10.121709 | 10.602503 | 9.173555  |
| Pt | 11.621608 | 15.672891 | 9.391607  |
| Pt | 12.614264 | 9.390969  | 9.237766  |
| Pt | 14.527988 | 11.326053 | 8.638305  |
| Pt | 10.486983 | 13.290328 | 8.533982  |
| Pt | 12.091803 | 11.399254 | 7.572351  |
| Pt | 13.210243 | 13.733567 | 8.200662  |
| Ru | 12.202370 | 14.882207 | 13.105260 |
| Ru | 12.687402 | 13.014483 | 14.914309 |
| Ru | 10.410449 | 13.077003 | 13.656812 |
| Ru | 10.818143 | 13.786225 | 11.193910 |
| Ru | 13.365772 | 14.196129 | 10.882941 |
| Ru | 14.530057 | 13.750916 | 13.165268 |
| Ru | 12.818111 | 10.138620 | 11.837750 |
| Ru | 11.647177 | 10.828068 | 14.047286 |
| Ru | 12.304106 | 11.968694 | 10.072814 |
| Ru | 10.475079 | 11.277280 | 11.777322 |
| Ru | 14.193839 | 11.238279 | 13.754492 |
| Ru | 14.602481 | 11.946956 | 11.291593 |
| Ru | 12.508297 | 12.516525 | 12.476521 |
| O  | 11.187967 | 10.092398 | 18.335291 |
| O  | 10.654066 | 8.964758  | 17.759340 |

**TS2/3a<sup>RuPt</sup>**

|    |           |           |           |
|----|-----------|-----------|-----------|
| Pt | 11.916963 | 11.374783 | 16.755222 |
| Pt | 13.044259 | 13.713943 | 17.338766 |
| Pt | 14.616014 | 11.790124 | 16.377886 |
| Pt | 10.575033 | 13.779394 | 16.325325 |
| Pt | 10.873919 | 8.983727  | 15.845987 |
| Pt | 14.977675 | 14.476622 | 15.680665 |
| Pt | 12.458288 | 15.680526 | 15.651117 |
| Pt | 13.470127 | 9.387730  | 15.536037 |
| Pt | 9.231292  | 11.346899 | 15.554951 |
| Pt | 16.018753 | 9.953500  | 15.055503 |
| Pt | 8.270391  | 13.749163 | 14.940073 |
| Pt | 16.521948 | 12.514935 | 14.505993 |
| Pt | 9.980409  | 15.694700 | 14.376534 |
| Pt | 16.684469 | 15.059786 | 13.734521 |
| Pt | 14.384866 | 16.393442 | 13.775054 |
| Pt | 11.911285 | 17.383894 | 13.676786 |
| Pt | 11.965524 | 8.222709  | 13.576649 |
| Pt | 9.459567  | 9.396000  | 13.563214 |
| Pt | 14.672979 | 8.623115  | 13.169004 |

|    |           |           |           |
|----|-----------|-----------|-----------|
| Pt | 8.118350  | 11.802627 | 13.124910 |
| Pt | 16.557583 | 10.546224 | 12.517206 |
| Pt | 8.468479  | 14.488798 | 12.400949 |
| Pt | 16.908695 | 13.217677 | 11.831543 |
| Pt | 10.367957 | 16.408249 | 11.740310 |
| Pt | 15.580113 | 15.616085 | 11.377598 |
| Pt | 13.086088 | 16.835693 | 11.355552 |
| Pt | 13.127881 | 7.634992  | 11.223446 |
| Pt | 10.649633 | 8.629582  | 11.170080 |
| Pt | 8.355968  | 9.970562  | 11.202793 |
| Pt | 15.042443 | 9.348866  | 10.522729 |
| Pt | 8.496142  | 12.521209 | 10.457620 |
| Pt | 16.728968 | 11.320702 | 9.977390  |
| Pt | 9.008732  | 15.074785 | 9.876431  |
| Pt | 15.602785 | 13.667618 | 9.416965  |
| Pt | 14.188607 | 15.907490 | 9.127835  |
| Pt | 10.057266 | 10.564790 | 9.247383  |
| Pt | 11.558804 | 15.618942 | 9.365235  |
| Pt | 12.548290 | 9.357832  | 9.278560  |
| Pt | 14.453466 | 11.271622 | 8.605160  |
| Pt | 10.407521 | 13.228316 | 8.566120  |
| Pt | 11.995400 | 11.333984 | 7.590240  |
| Pt | 13.126625 | 13.671578 | 8.167800  |
| Ru | 12.238005 | 14.900634 | 13.068059 |
| Ru | 12.753523 | 13.079494 | 14.862945 |
| Ru | 10.430049 | 13.093456 | 13.718869 |
| Ru | 10.793630 | 13.766543 | 11.218681 |
| Ru | 13.338486 | 14.165367 | 10.840572 |
| Ru | 14.556496 | 13.751100 | 13.102794 |
| Ru | 12.805859 | 10.126969 | 11.880322 |
| Ru | 11.670988 | 10.829412 | 14.128798 |
| Ru | 12.252334 | 11.927977 | 10.087659 |
| Ru | 10.470487 | 11.262821 | 11.857629 |
| Ru | 14.226357 | 11.256311 | 13.737908 |
| Ru | 14.577888 | 11.922990 | 11.254913 |
| Ru | 12.511060 | 12.525087 | 12.464300 |
| O  | 8.775576  | 10.592615 | 17.178341 |
| O  | 9.752322  | 8.920286  | 17.279560 |

### 3a<sup>RuPt</sup>

|    |           |           |           |
|----|-----------|-----------|-----------|
| Pt | 11.905089 | 11.218673 | 16.821877 |
| Pt | 12.942627 | 13.621964 | 17.384348 |
| Pt | 14.546774 | 11.717269 | 16.414354 |
| Pt | 10.467925 | 13.868380 | 16.365381 |
| Pt | 10.743770 | 8.936489  | 15.758989 |

|    |           |           |           |
|----|-----------|-----------|-----------|
| Pt | 14.897214 | 14.407331 | 15.769802 |
| Pt | 12.392863 | 15.631779 | 15.705826 |
| Pt | 13.416810 | 9.355161  | 15.535754 |
| Pt | 9.244100  | 11.242673 | 15.414330 |
| Pt | 15.973478 | 9.913620  | 15.076134 |
| Pt | 8.229700  | 13.664825 | 14.891561 |
| Pt | 16.485361 | 12.478954 | 14.578848 |
| Pt | 9.955021  | 15.653980 | 14.416400 |
| Pt | 16.658691 | 15.039806 | 13.872663 |
| Pt | 14.352118 | 16.363594 | 13.881794 |
| Pt | 11.885908 | 17.361826 | 13.744646 |
| Pt | 11.932992 | 8.192380  | 13.498018 |
| Pt | 9.430360  | 9.391187  | 13.427078 |
| Pt | 14.656761 | 8.603471  | 13.166416 |
| Pt | 8.101721  | 11.775753 | 13.005320 |
| Pt | 16.551146 | 10.552306 | 12.555819 |
| Pt | 8.475459  | 14.465674 | 12.373109 |
| Pt | 16.909334 | 13.229299 | 11.934749 |
| Pt | 10.370498 | 16.399784 | 11.775833 |
| Pt | 15.593517 | 15.634900 | 11.504938 |
| Pt | 13.102711 | 16.837734 | 11.434964 |
| Pt | 13.154893 | 7.663760  | 11.178918 |
| Pt | 10.680350 | 8.639473  | 11.063064 |
| Pt | 8.379458  | 9.982399  | 11.059352 |
| Pt | 15.085515 | 9.382372  | 10.535658 |
| Pt | 8.538874  | 12.551093 | 10.375631 |
| Pt | 16.792551 | 11.366808 | 10.032197 |
| Pt | 9.061371  | 15.108906 | 9.854094  |
| Pt | 15.670243 | 13.713596 | 9.505953  |
| Pt | 14.265758 | 15.946598 | 9.220908  |
| Pt | 10.146724 | 10.610374 | 9.168151  |
| Pt | 11.626281 | 15.671044 | 9.406462  |
| Pt | 12.624722 | 9.404688  | 9.233962  |
| Pt | 14.532667 | 11.334629 | 8.637070  |
| Pt | 10.496478 | 13.287512 | 8.542692  |
| Pt | 12.108465 | 11.409257 | 7.554399  |
| Pt | 13.208164 | 13.736021 | 8.203560  |
| Ru | 12.195257 | 14.870972 | 13.116825 |
| Ru | 12.698802 | 13.026905 | 14.895922 |
| Ru | 10.415154 | 13.047693 | 13.687940 |
| Ru | 10.814343 | 13.772840 | 11.212269 |
| Ru | 13.365677 | 14.193699 | 10.892380 |
| Ru | 14.530842 | 13.739011 | 13.178189 |
| Ru | 12.814069 | 10.135110 | 11.865518 |
| Ru | 11.632170 | 10.779964 | 14.110972 |
| Ru | 12.303684 | 11.960567 | 10.084105 |
| Ru | 10.488627 | 11.262719 | 11.807073 |
| Ru | 14.186714 | 11.229083 | 13.763289 |

|    |           |           |           |
|----|-----------|-----------|-----------|
| Ru | 14.599591 | 11.939709 | 11.298573 |
| Ru | 12.526562 | 12.539188 | 12.450306 |
| O  | 10.019164 | 12.018782 | 17.181459 |
| O  | 10.012427 | 8.056726  | 17.129309 |

### 3b<sup>RuPt</sup>

|    |           |           |           |
|----|-----------|-----------|-----------|
| Pt | 11.783286 | 11.261843 | 16.849066 |
| Pt | 12.918101 | 13.630131 | 17.440676 |
| Pt | 14.551161 | 11.721518 | 16.387354 |
| Pt | 10.455818 | 13.711076 | 16.279160 |
| Pt | 10.733758 | 9.040042  | 15.700830 |
| Pt | 14.854404 | 14.396018 | 15.760122 |
| Pt | 12.396667 | 15.589743 | 15.695104 |
| Pt | 13.413030 | 9.310802  | 15.510201 |
| Pt | 9.301589  | 11.308543 | 15.401381 |
| Pt | 15.961462 | 9.906128  | 15.059288 |
| Pt | 8.216131  | 13.669438 | 14.854087 |
| Pt | 16.482330 | 12.470133 | 14.559646 |
| Pt | 9.930408  | 15.653311 | 14.386090 |
| Pt | 16.652866 | 15.037487 | 13.869917 |
| Pt | 14.338781 | 16.359735 | 13.870428 |
| Pt | 11.871731 | 17.360167 | 13.743363 |
| Pt | 11.894605 | 8.164008  | 13.472565 |
| Pt | 9.424561  | 9.364256  | 13.407180 |
| Pt | 14.628455 | 8.606554  | 13.152377 |
| Pt | 8.099126  | 11.779097 | 12.979357 |
| Pt | 16.553741 | 10.534675 | 12.549078 |
| Pt | 8.451812  | 14.471110 | 12.334574 |
| Pt | 16.906336 | 13.219304 | 11.932171 |
| Pt | 10.369797 | 16.395008 | 11.759186 |
| Pt | 15.589352 | 15.632047 | 11.497023 |
| Pt | 13.096839 | 16.842995 | 11.431067 |
| Pt | 13.135815 | 7.656929  | 11.162001 |
| Pt | 10.666708 | 8.648088  | 11.043819 |
| Pt | 8.359264  | 9.977930  | 11.035466 |
| Pt | 15.081779 | 9.365705  | 10.529673 |
| Pt | 8.528245  | 12.549973 | 10.356053 |
| Pt | 16.781399 | 11.349086 | 10.032992 |
| Pt | 9.059058  | 15.101128 | 9.828710  |
| Pt | 15.656881 | 13.695918 | 9.490730  |
| Pt | 14.258554 | 15.941016 | 9.214522  |
| Pt | 10.120650 | 10.607121 | 9.155703  |
| Pt | 11.619963 | 15.657348 | 9.383906  |
| Pt | 12.623769 | 9.390790  | 9.222001  |



|    |           |           |           |
|----|-----------|-----------|-----------|
| Pt | 14.523193 | 11.318624 | 8.622029  |
| Pt | 10.488941 | 13.278852 | 8.515224  |
| Pt | 12.088470 | 11.384382 | 7.557931  |
| Pt | 13.206333 | 13.719481 | 8.190519  |
| Ru | 12.194880 | 14.885600 | 13.077959 |
| Ru | 12.713124 | 13.068102 | 14.864170 |
| Ru | 10.413156 | 13.080634 | 13.655123 |
| Ru | 10.811160 | 13.768845 | 11.183281 |
| Ru | 13.360908 | 14.183702 | 10.870421 |
| Ru | 14.537644 | 13.747538 | 13.140059 |
| Ru | 12.800996 | 10.129059 | 11.860178 |
| Ru | 11.658639 | 10.858531 | 14.141178 |
| Ru | 12.297099 | 11.950511 | 10.069468 |
| Ru | 10.478445 | 11.257783 | 11.798697 |
| Ru | 14.194320 | 11.243423 | 13.755422 |
| Ru | 14.595406 | 11.930248 | 11.283269 |
| Ru | 12.499321 | 12.496717 | 12.461719 |
| O  | 12.450700 | 12.755610 | 19.151316 |
| O  | 11.866115 | 11.541634 | 18.958191 |
| H  | 11.011506 | 9.694831  | 17.267447 |

### TS3/4b<sup>RuPt</sup>

|    |           |           |           |
|----|-----------|-----------|-----------|
| Pt | 11.777221 | 11.205987 | 16.756907 |
| Pt | 12.920173 | 13.581703 | 17.444641 |
| Pt | 14.505694 | 11.651539 | 16.376177 |
| Pt | 10.464281 | 13.622477 | 16.283463 |
| Pt | 10.734734 | 9.016473  | 15.658906 |
| Pt | 14.857284 | 14.337543 | 15.763803 |
| Pt | 12.386238 | 15.542553 | 15.706963 |
| Pt | 13.367563 | 9.284039  | 15.489424 |
| Pt | 9.332338  | 11.251810 | 15.396749 |
| Pt | 15.928581 | 9.849978  | 15.034426 |
| Pt | 8.219905  | 13.609329 | 14.857364 |
| Pt | 16.461081 | 12.412577 | 14.567943 |
| Pt | 9.927976  | 15.598652 | 14.417808 |
| Pt | 16.641825 | 14.980226 | 13.887546 |
| Pt | 14.340202 | 16.326403 | 13.891565 |
| Pt | 11.864460 | 17.310041 | 13.777526 |
| Pt | 11.893949 | 8.133944  | 13.423864 |
| Pt | 9.409654  | 9.345417  | 13.366787 |
| Pt | 14.616167 | 8.577356  | 13.107122 |
| Pt | 8.096243  | 11.756879 | 12.957297 |
| Pt | 16.537004 | 10.511641 | 12.531477 |
| Pt | 8.459631  | 14.450741 | 12.345758 |

|    |           |           |           |
|----|-----------|-----------|-----------|
| Pt | 16.905190 | 13.190353 | 11.931196 |
| Pt | 10.365268 | 16.379694 | 11.780665 |
| Pt | 15.589380 | 15.611471 | 11.524192 |
| Pt | 13.096692 | 16.827070 | 11.466747 |
| Pt | 13.122076 | 7.647868  | 11.107593 |
| Pt | 10.659807 | 8.642402  | 10.981807 |
| Pt | 8.357354  | 9.971354  | 10.998114 |
| Pt | 15.066436 | 9.360992  | 10.476642 |
| Pt | 8.534184  | 12.546462 | 10.326327 |
| Pt | 16.782475 | 11.345922 | 10.015013 |
| Pt | 9.059311  | 15.112220 | 9.837264  |
| Pt | 15.662157 | 13.704567 | 9.494843  |
| Pt | 14.267579 | 15.957895 | 9.237608  |
| Pt | 10.117774 | 10.618919 | 9.105960  |
| Pt | 11.625428 | 15.673251 | 9.401831  |
| Pt | 12.619599 | 9.398860  | 9.163490  |
| Pt | 14.528993 | 11.335919 | 8.595222  |
| Pt | 10.490211 | 13.305624 | 8.502170  |
| Pt | 12.096474 | 11.425190 | 7.522872  |
| Pt | 13.214454 | 13.748943 | 8.187228  |
| Ru | 12.192599 | 14.846292 | 13.101186 |
| Ru | 12.693794 | 12.997903 | 14.894485 |
| Ru | 10.409337 | 13.031787 | 13.638249 |
| Ru | 10.815656 | 13.777489 | 11.177761 |
| Ru | 13.366194 | 14.187477 | 10.878761 |
| Ru | 14.524426 | 13.709222 | 13.154795 |
| Ru | 12.815873 | 10.118751 | 11.773708 |
| Ru | 11.619850 | 10.753126 | 13.990762 |
| Ru | 12.304849 | 11.971056 | 10.031450 |
| Ru | 10.466908 | 11.264272 | 11.719666 |
| Ru | 14.172167 | 11.196792 | 13.724764 |
| Ru | 14.600984 | 11.931543 | 11.264814 |
| Ru | 12.495060 | 12.474031 | 12.427863 |
| O  | 12.723764 | 13.265191 | 19.362099 |
| O  | 12.197132 | 12.209202 | 19.900921 |
| H  | 11.673575 | 11.068027 | 18.336069 |

#### 4b<sup>RuPt</sup>

|    |           |           |           |
|----|-----------|-----------|-----------|
| Pt | 11.782660 | 11.258322 | 16.740294 |
| Pt | 12.908525 | 13.613369 | 17.424437 |
| Pt | 14.515808 | 11.716439 | 16.403706 |
| Pt | 10.481410 | 13.684945 | 16.300983 |
| Pt | 10.733594 | 9.045677  | 15.697007 |
| Pt | 14.887828 | 14.409344 | 15.765985 |

|    |           |           |           |
|----|-----------|-----------|-----------|
| Pt | 12.381845 | 15.623312 | 15.699320 |
| Pt | 13.376154 | 9.327977  | 15.542846 |
| Pt | 9.331716  | 11.294565 | 15.434032 |
| Pt | 15.934581 | 9.907118  | 15.083771 |
| Pt | 8.229295  | 13.654979 | 14.882077 |
| Pt | 16.475374 | 12.462334 | 14.573728 |
| Pt | 9.923255  | 15.647008 | 14.401615 |
| Pt | 16.634829 | 15.017964 | 13.852594 |
| Pt | 14.335355 | 16.361069 | 13.858414 |
| Pt | 11.860536 | 17.335991 | 13.724325 |
| Pt | 11.907517 | 8.157418  | 13.489071 |
| Pt | 9.406281  | 9.373619  | 13.423057 |
| Pt | 14.628902 | 8.604154  | 13.169831 |
| Pt | 8.090384  | 11.779716 | 12.998058 |
| Pt | 16.536848 | 10.532124 | 12.571645 |
| Pt | 8.453139  | 14.462113 | 12.356733 |
| Pt | 16.901011 | 13.208081 | 11.926332 |
| Pt | 10.356912 | 16.387531 | 11.750460 |
| Pt | 15.579140 | 15.614614 | 11.487702 |
| Pt | 13.084563 | 16.828033 | 11.420107 |
| Pt | 13.127552 | 7.651876  | 11.182577 |
| Pt | 10.660226 | 8.641218  | 11.057487 |
| Pt | 8.353596  | 9.969432  | 11.055925 |
| Pt | 15.063068 | 9.356252  | 10.533243 |
| Pt | 8.525914  | 12.530674 | 10.358714 |
| Pt | 16.769815 | 11.335555 | 10.042841 |
| Pt | 9.048726  | 15.085751 | 9.835624  |
| Pt | 15.649218 | 13.684271 | 9.493103  |
| Pt | 14.251928 | 15.928852 | 9.198905  |
| Pt | 10.111918 | 10.590916 | 9.160284  |
| Pt | 11.611423 | 15.647001 | 9.384855  |
| Pt | 12.611429 | 9.376569  | 9.226670  |
| Pt | 14.517413 | 11.301860 | 8.629064  |
| Pt | 10.474081 | 13.266804 | 8.520740  |
| Pt | 12.082928 | 11.378865 | 7.563231  |
| Pt | 13.196413 | 13.706246 | 8.190786  |
| Ru | 12.189754 | 14.862294 | 13.108626 |
| Ru | 12.696449 | 13.061995 | 14.925819 |
| Ru | 10.414112 | 13.066682 | 13.665615 |
| Ru | 10.806998 | 13.771141 | 11.193048 |
| Ru | 13.355968 | 14.184576 | 10.883900 |
| Ru | 14.511485 | 13.733520 | 13.174109 |
| Ru | 12.804930 | 10.126001 | 11.856538 |
| Ru | 11.641879 | 10.831291 | 14.077647 |
| Ru | 12.293398 | 11.949396 | 10.066356 |
| Ru | 10.466216 | 11.262431 | 11.793364 |
| Ru | 14.172610 | 11.242512 | 13.769693 |
| Ru | 14.591925 | 11.932460 | 11.295083 |

|    |           |           |           |
|----|-----------|-----------|-----------|
| Ru | 12.491040 | 12.485560 | 12.418409 |
| O  | 13.314411 | 13.884362 | 19.319443 |
| O  | 12.677905 | 12.882312 | 20.161850 |
| H  | 13.465325 | 12.380652 | 20.470154 |

**TS4/5b<sup>RuPt</sup>**

|    |           |           |           |
|----|-----------|-----------|-----------|
| Pt | 11.814309 | 11.287491 | 16.748960 |
| Pt | 12.954680 | 13.606149 | 17.364969 |
| Pt | 14.539104 | 11.703585 | 16.401192 |
| Pt | 10.503713 | 13.705964 | 16.325968 |
| Pt | 10.739207 | 9.069982  | 15.744787 |
| Pt | 14.934385 | 14.379385 | 15.759240 |
| Pt | 12.436542 | 15.613919 | 15.702684 |
| Pt | 13.376504 | 9.330730  | 15.550145 |
| Pt | 9.351359  | 11.323198 | 15.460396 |
| Pt | 15.938348 | 9.861588  | 15.083140 |
| Pt | 8.255732  | 13.677734 | 14.905861 |
| Pt | 16.488068 | 12.412075 | 14.551869 |
| Pt | 9.954550  | 15.648185 | 14.408686 |
| Pt | 16.669651 | 14.963714 | 13.832848 |
| Pt | 14.396551 | 16.331745 | 13.845036 |
| Pt | 11.913051 | 17.394451 | 13.755967 |
| Pt | 11.882691 | 8.158398  | 13.523346 |
| Pt | 9.398993  | 9.392444  | 13.470379 |
| Pt | 14.606324 | 8.575617  | 13.175461 |
| Pt | 8.090308  | 11.800987 | 13.033623 |
| Pt | 16.524197 | 10.481821 | 12.562431 |
| Pt | 8.463600  | 14.481017 | 12.379133 |
| Pt | 16.917997 | 13.151966 | 11.908356 |
| Pt | 10.400502 | 16.396139 | 11.775743 |
| Pt | 15.620528 | 15.579263 | 11.469563 |
| Pt | 13.113514 | 16.804693 | 11.441871 |
| Pt | 13.085554 | 7.632143  | 11.212997 |
| Pt | 10.626986 | 8.636885  | 11.094772 |
| Pt | 8.333258  | 9.981300  | 11.105779 |
| Pt | 15.031642 | 9.311387  | 10.533117 |
| Pt | 8.516611  | 12.544497 | 10.391452 |
| Pt | 16.754583 | 11.273134 | 10.031572 |
| Pt | 9.063883  | 15.099174 | 9.866017  |
| Pt | 15.656228 | 13.640544 | 9.482448  |
| Pt | 14.270447 | 15.901883 | 9.203015  |
| Pt | 10.084292 | 10.586155 | 9.195147  |
| Pt | 11.624696 | 15.645939 | 9.388230  |
| Pt | 12.571795 | 9.349664  | 9.248980  |

|    |           |           |           |
|----|-----------|-----------|-----------|
| Pt | 14.491497 | 11.262092 | 8.632154  |
| Pt | 10.465924 | 13.263774 | 8.539844  |
| Pt | 12.051714 | 11.351823 | 7.574271  |
| Pt | 13.189940 | 13.683043 | 8.193604  |
| Ru | 12.214671 | 14.892654 | 13.080497 |
| Ru | 12.715446 | 13.088361 | 14.862879 |
| Ru | 10.423298 | 13.092158 | 13.663361 |
| Ru | 10.819849 | 13.776655 | 11.191736 |
| Ru | 13.363974 | 14.165014 | 10.865088 |
| Ru | 14.537891 | 13.722136 | 13.137081 |
| Ru | 12.788233 | 10.111970 | 11.857989 |
| Ru | 11.640391 | 10.831975 | 14.082805 |
| Ru | 12.280889 | 11.939206 | 10.069963 |
| Ru | 10.456701 | 11.273993 | 11.802981 |
| Ru | 14.182957 | 11.222381 | 13.759008 |
| Ru | 14.585735 | 11.906507 | 11.276329 |
| Ru | 12.505087 | 12.459096 | 12.463537 |
| O  | 11.705073 | 18.789295 | 15.128897 |
| O  | 12.046630 | 18.252798 | 16.458242 |
| H  | 11.148829 | 18.183575 | 16.855585 |

### 5b<sup>RuPt</sup>

|    |           |           |           |
|----|-----------|-----------|-----------|
| Pt | 11.827703 | 11.237808 | 16.742805 |
| Pt | 12.966335 | 13.551819 | 17.376040 |
| Pt | 14.541841 | 11.655682 | 16.396812 |
| Pt | 10.498796 | 13.650088 | 16.349514 |
| Pt | 10.736930 | 9.035149  | 15.731454 |
| Pt | 14.956034 | 14.337918 | 15.780219 |
| Pt | 12.431754 | 15.601651 | 15.735202 |
| Pt | 13.380411 | 9.297332  | 15.529563 |
| Pt | 9.361633  | 11.306276 | 15.462012 |
| Pt | 15.949039 | 9.836153  | 15.069549 |
| Pt | 8.257725  | 13.667643 | 14.919515 |
| Pt | 16.483730 | 12.400673 | 14.551011 |
| Pt | 9.956984  | 15.645096 | 14.426771 |
| Pt | 16.668097 | 14.965240 | 13.847661 |
| Pt | 14.391379 | 16.329620 | 13.860148 |
| Pt | 11.901128 | 17.465324 | 13.678301 |
| Pt | 11.881167 | 8.150404  | 13.502153 |
| Pt | 9.398717  | 9.390366  | 13.455879 |
| Pt | 14.607830 | 8.570423  | 13.155768 |
| Pt | 8.096731  | 11.800610 | 13.032414 |
| Pt | 16.521858 | 10.485212 | 12.548548 |
| Pt | 8.470707  | 14.492011 | 12.399796 |

|    |           |           |           |
|----|-----------|-----------|-----------|
| Pt | 16.909023 | 13.157390 | 11.908874 |
| Pt | 10.403577 | 16.382555 | 11.771649 |
| Pt | 15.615002 | 15.586130 | 11.485616 |
| Pt | 13.114466 | 16.796095 | 11.428801 |
| Pt | 13.083334 | 7.642147  | 11.191061 |
| Pt | 10.624932 | 8.642994  | 11.078506 |
| Pt | 8.328838  | 9.988477  | 11.100331 |
| Pt | 15.028480 | 9.319750  | 10.516710 |
| Pt | 8.516737  | 12.552661 | 10.407495 |
| Pt | 16.755150 | 11.283753 | 10.024954 |
| Pt | 9.059963  | 15.108885 | 9.878746  |
| Pt | 15.653302 | 13.649194 | 9.496732  |
| Pt | 14.269742 | 15.911612 | 9.211169  |
| Pt | 10.082618 | 10.601802 | 9.195440  |
| Pt | 11.621906 | 15.652506 | 9.385625  |
| Pt | 12.568058 | 9.366788  | 9.240330  |
| Pt | 14.487168 | 11.278223 | 8.632089  |
| Pt | 10.467489 | 13.278815 | 8.553493  |
| Pt | 12.047806 | 11.370678 | 7.574024  |
| Pt | 13.182698 | 13.696355 | 8.207667  |
| Ru | 12.213205 | 14.944096 | 13.138305 |
| Ru | 12.718431 | 13.083135 | 14.887296 |
| Ru | 10.434450 | 13.102274 | 13.681367 |
| Ru | 10.825043 | 13.784888 | 11.212340 |
| Ru | 13.360257 | 14.171691 | 10.888191 |
| Ru | 14.528205 | 13.727713 | 13.160281 |
| Ru | 12.786448 | 10.118653 | 11.856176 |
| Ru | 11.637518 | 10.820745 | 14.083590 |
| Ru | 12.278890 | 11.951923 | 10.081697 |
| Ru | 10.454938 | 11.284093 | 11.815465 |
| Ru | 14.185508 | 11.211936 | 13.759401 |
| Ru | 14.586401 | 11.916627 | 11.288730 |
| Ru | 12.507593 | 12.446291 | 12.468896 |
| O  | 11.664961 | 19.003763 | 14.536407 |
| O  | 12.456574 | 16.819841 | 17.303217 |
| H  | 11.527919 | 16.957298 | 17.580219 |

### 5RuPt

|    |           |           |           |
|----|-----------|-----------|-----------|
| Pt | 11.811465 | 11.174047 | 16.724855 |
| Pt | 12.993017 | 13.493210 | 17.444523 |
| Pt | 14.547194 | 11.637355 | 16.363176 |
| Pt | 10.466950 | 13.525287 | 16.431192 |
| Pt | 10.749600 | 8.994186  | 15.658337 |
| Pt | 14.952358 | 14.329122 | 15.755378 |

|    |           |           |           |
|----|-----------|-----------|-----------|
| Pt | 12.573941 | 15.637012 | 15.785223 |
| Pt | 13.393763 | 9.259818  | 15.490040 |
| Pt | 9.363778  | 11.252289 | 15.447571 |
| Pt | 15.949737 | 9.825145  | 15.016079 |
| Pt | 8.259255  | 13.632007 | 14.930386 |
| Pt | 16.507431 | 12.379195 | 14.537890 |
| Pt | 9.867256  | 15.711109 | 14.378315 |
| Pt | 16.688486 | 14.938487 | 13.837284 |
| Pt | 14.406122 | 16.300611 | 13.895197 |
| Pt | 11.936817 | 17.316133 | 13.791530 |
| Pt | 11.895485 | 8.134966  | 13.420107 |
| Pt | 9.395396  | 9.368196  | 13.403795 |
| Pt | 14.609818 | 8.562485  | 13.092312 |
| Pt | 8.105771  | 11.795928 | 13.019209 |
| Pt | 16.529207 | 10.482385 | 12.502421 |
| Pt | 8.484217  | 14.485110 | 12.406566 |
| Pt | 16.909428 | 13.150960 | 11.881364 |
| Pt | 10.393015 | 16.394053 | 11.815590 |
| Pt | 15.611246 | 15.587852 | 11.493943 |
| Pt | 13.124834 | 16.814327 | 11.472281 |
| Pt | 13.090796 | 7.648735  | 11.098824 |
| Pt | 10.629427 | 8.662508  | 11.019109 |
| Pt | 8.331576  | 10.008554 | 11.053689 |
| Pt | 15.029976 | 9.342793  | 10.462707 |
| Pt | 8.513840  | 12.575704 | 10.393119 |
| Pt | 16.745058 | 11.306236 | 9.976296  |
| Pt | 9.062635  | 15.131770 | 9.889850  |
| Pt | 15.642081 | 13.677594 | 9.478205  |
| Pt | 14.263166 | 15.941744 | 9.225630  |
| Pt | 10.080880 | 10.642580 | 9.154577  |
| Pt | 11.626099 | 15.685800 | 9.431972  |
| Pt | 12.563740 | 9.402328  | 9.182156  |
| Pt | 14.484451 | 11.323311 | 8.591041  |
| Pt | 10.468203 | 13.312645 | 8.547638  |
| Pt | 12.047832 | 11.425783 | 7.550103  |
| Pt | 13.180325 | 13.738950 | 8.200759  |
| Ru | 12.223191 | 14.846174 | 13.159840 |
| Ru | 12.735842 | 13.012799 | 14.941382 |
| Ru | 10.438523 | 13.058886 | 13.707091 |
| Ru | 10.818390 | 13.789621 | 11.228106 |
| Ru | 13.365655 | 14.188036 | 10.905632 |
| Ru | 14.542227 | 13.688627 | 13.170807 |
| Ru | 12.791297 | 10.120896 | 11.818851 |
| Ru | 11.651552 | 10.796041 | 14.056468 |
| Ru | 12.278130 | 11.972453 | 10.062696 |
| Ru | 10.458466 | 11.280105 | 11.797488 |
| Ru | 14.182409 | 11.194242 | 13.737336 |
| Ru | 14.585036 | 11.917038 | 11.268856 |

|    |           |           |           |
|----|-----------|-----------|-----------|
| Ru | 12.500447 | 12.473464 | 12.421041 |
| O  | 10.566468 | 15.604130 | 16.329758 |
| O  | 12.882750 | 14.005916 | 19.332605 |
| H  | 12.366433 | 13.340621 | 19.830925 |
